1 **Title: Host cholesterol dependent activation of VapC12 toxin enriches persister**  
2 **population during *Mycobacterium tuberculosis* infection**

3 Sakshi Talwar<sup>1</sup>, Manitosh Pandey<sup>1</sup>, Chandresh Sharma<sup>1</sup>, Rintu Kutum<sup>2</sup>, Josephine Lum<sup>3</sup>,  
4 Daniel Carbajo<sup>3</sup>, Renu Goel<sup>4</sup>, Michael Poidinger<sup>3</sup>, Debasis Dash<sup>2</sup> Amit Singhal<sup>1, 3</sup> and  
5 Amit Kumar Pandey<sup>1\*</sup>

6 **Affiliations:**

7 <sup>1</sup>Mycobacterial pathogenesis laboratory, <sup>4</sup>Drug Discovery Research Center, Translational  
8 Health Science and Technology Institute, Faridabad, Haryana 121001

9 <sup>2</sup>CSIR-Institute of Genomics and Integrative Biology, New Delhi

10 <sup>3</sup>Singapore Immunology Network, Singapore

11 Corresponding address:

12 Translational Health Science and Technology Institute

13 3<sup>rd</sup> Milestone, PO Box No. 03

14 Gurugram-Faridabad Expressway

15 Faridabad, Haryana

16 Phone: 91-129-2876322

17 FAX: 91-129-2876500

18 E-mail: [amitpandey@thsti.res.in](mailto:amitpandey@thsti.res.in)

19 \*Correspondence and requests for materials should be addressed to

20 [amitpandey@thsti.res.in](mailto:amitpandey@thsti.res.in)

21

22

23

24

25

26

27

28

29

30

31

32 **Abstract**

33 **A worldwide increase in the frequency of multidrug-resistant and extensively drug-**  
34 **resistant cases of tuberculosis is mainly due to therapeutic noncompliance associated**  
35 **with a lengthy treatment regimen. Depending on the drug susceptibility profile, the**  
36 **treatment duration can extend from 6 months to 2 years. This protracted regimen is**  
37 **attributed to a supposedly non-replicating and metabolically inert subset of the**  
38 ***Mycobacterium tuberculosis* (Mtb) population, called ‘persisters’. The mechanism**  
39 **underlying stochastic generation and enrichment of persisters is not fully known.**  
40 **We have previously reported that the utilization of host cholesterol is essential for**  
41 **mycobacterial persistence. In this study, we have demonstrated that cholesterol-**  
42 **induced activation of a ribonuclease toxin (VapC12) inhibits translation by**  
43 **targeting proT tRNA in Mtb. This results in cholesterol-specific growth modulation**  
44 **that increases the frequency of the generation of persisters in a heterogeneous Mtb**  
45 **population. Also, a null mutant strain of this toxin ( $\Delta vapC12$ ) failed to persist and**  
46 **demonstrated an enhanced growth phenotype in a guinea pig model of Mtb**  
47 **infection. Thus, we have identified a novel strategy through which cholesterol-**  
48 **specific activation of a toxin–antitoxin (TA) module in Mtb enhances persister**  
49 **formation during infection. In addition to identifying the mechanism, the study**  
50 **provides opportunity for targeting persisters, a new paradigm facilitating**  
51 **tuberculosis drug development.**

52

53

54

55

56

57

58

## 59 **Introduction**

60 Globally, a third of the human population is infected with *Mycobacterium*  
61 *tuberculosis* (Mtb), the causative agent of tuberculosis. Being an obligate intracellular  
62 pathogen, Mtb has co-evolved with humans for centuries (2-4). Unlike the actively  
63 infected population, the latently infected individuals harbour Mtb for decades without  
64 showing any overt symptoms. This phenotype of Mtb is attributed to a slow-growing,  
65 metabolically altered subset of the heterogeneous Mtb population called persisters (5, 6).  
66 These persisters are refractory to antimycobacterial drugs and can only be targeted using  
67 a strict regimen consisting of a combination of drugs for an unusually extended period.  
68 The protracted regimen triggers noncompliance and results in an increased frequency of  
69 multidrug-resistant (MDR) and extensively drug-resistant (XDR) tuberculosis cases(7-  
70 10).

71 Persisters are extremely drug tolerant sub-population that possess an extraordinary  
72 ability to hide within a host. Although several studies have described stress-induced  
73 generation of persisters under in-vitro growth conditions (11-14), the exact conditions  
74 triggering the generation and enrichment of persisters inside the host during a normal  
75 course of mycobacterial infection remain unclear. Upon infection Mtb induces the  
76 formation of lipid-rich foamy macrophages. Lysis of these macrophages results in the  
77 formation of the caseous core of a typical ‘tuberculous granuloma’, providing Mtb with a  
78 cholesterol-rich niche. While residing in this nutrient-deprived granuloma, Mtb adapts  
79 itself to utilize cholesterol as a favoured carbon source (15). This cholesterol utilization  
80 causes inhibition of growth and activation of pathways leading to the generation of  
81 persisters in the mycobacterial population (15, 16). Mtb facilitate intracellular  
82 accumulation of cholesterol by up regulating cholesterol biosynthesis pathways that  
83 convert resident macrophages into foamy macrophages (17). These findings imply that  
84 Mtb hijacks host pathways to build a favourable niche for itself in order to remain as a  
85 ‘persister’ for decades, facilitating long-term persistence, which is a hallmark of  
86 mycobacterial pathogenesis (18, 19).

87 Toxin–antitoxin (TA) proteins play a crucial role in generating persisters in several  
88 bacterial species(20-22). These TA systems, known to modulate growth under various  
89 growth and stress conditions, are found in wide range of bacterial and archaeal

90 chromosomes and plasmids (23-25). Research conducted during the past decade has  
91 clearly demonstrated that TA loci act as effectors of dormancy and persistence in several  
92 bacterial species (20, 21). Each TA locus consists of genes expressing a pair of toxin-  
93 antitoxin protein. Antitoxin, being more labile, degrades under specific growth and stress  
94 conditions resulting in the activation of cognate toxin. The activated toxin modulates  
95 growth by targeting growth related genes.

96 The genome of Mtb constitute 88 TA systems whereas saprophytic soil dwelling  
97 *Mycobacterium smegmatis* genome has only one TA locus, clearly highlighting the role  
98 of TA systems in bacterial adaptation and survival in a very hostile environment inside  
99 the host (26). Based on the mechanism of toxin activation, the TA system is classified  
100 into seven different types. The most characterized of all, the VapBC family, belongs to  
101 type II group. The toxin from the type II group targets all forms of RNA including  
102 mRNA, rRNA and tRNA. Although, the type II TA system has been shown to regulate  
103 persistence in several bacterial species, the exact mechanism is not very clear. It is  
104 hypothesized that each TA pair is required for survival of bacteria under specific growth  
105 and stress condition (27, 28), however presence of a very high number of the TA system  
106 in Mtb genome also increases the chances of redundancy and the possibility of multiple  
107 TA systems regulating specific growth conditions.

108 In the current study, we have identified the role of one such Mtb ribonuclease toxin,  
109 VapC12, to be critical for cholesterol-induced generation of antibiotic persistence in  
110 mycobacteria. Our data conclusively demonstrate that cholesterol activates the  
111 ribonuclease toxin by disrupting its binding to the cognate anti-toxin VapB12. We further  
112 demonstrated that the proT tRNA of Mtb is a bonafide substrate of the VapC12  
113 ribonuclease toxin and that the toxin mediated modulation of the proT tRNA regulate the  
114 generation and enrichment of the cholesterol-induced persisters in mycobacteria. Finally,  
115 we also demonstrated that the *vapC12* dependent enrichment of antibiotic persistence  
116 also contribute towards disease persistence as seen in a guinea pig model of tuberculosis  
117 infection.

118

119

120

121 **Results**

122 ***vapC12* gene is essential for cholesterol-specific growth modulation in**  
123 ***Mycobacterium tuberculosis* (Mtb)**

124 We have previously demonstrated that utilization of host cholesterol as a carbon  
125 source is essential for maintaining persistence during Mtb infection(15). In this study, we  
126 have used Mtb grown in a cholesterol-rich media as an *in-vitro* model to examine the role  
127 of cholesterol in the formation, maintenance, and enrichment of persisters during Mtb  
128 infection. We have initially analysed the metabolic and replication rates of Mtb grown in  
129 the cholesterol-rich media. We have observed a decrease in the replication and metabolic  
130 rates of wild-type (WT) H37Rv grown in the cholesterol-rich media by ten- and three-  
131 fold, respectively, compared with (WT) H37Rv grown in the glycerol-rich media (Fig.  
132 1A, 1B). An *in-vitro* time-kill curve assay revealed a cholesterol-specific increase in the  
133 frequency of the generation of a rifamycin-tolerant sub-population (Fig. 1C). The TA loci  
134 across bacterial species regulate growth(21, 29-31), therefore we speculated the  
135 aforementioned phenotype to be regulated by one of the Mtb TA loci. For that we  
136 analysed the data of a transposon mutagenesis screening performed in Mtb H37Rv to  
137 identify genes essential for growth in a cholesterol-rich environment(32). Through  
138 manual curation of data, we identified transposon insertions in six VapC toxins that were  
139 over-represented in cholesterol than in glycerol. This finding suggests the role of one or  
140 all of these toxins in the cholesterol-mediated growth modulation of Mtb (Fig. S1). Of  
141 these six *vapC* genes, we generated clean deletion mutants for the top two toxins VapC8  
142 and VapC12, which demonstrated the highest increase in the growth rate. We found that  
143 compared with the WT strain, the *vapC8*-null strain showed no significant growth  
144 difference in the cholesterol-rich media (Fig. S2), whereas the mutant lacking *vapC12*  
145 gene failed to slow down its growth and was metabolically more active in the cholesterol-  
146 rich media, suggesting essentiality of this gene in cholesterol-mediated growth  
147 retardation. The mutant phenotype was found to be gene specific because adding back the  
148 *vapBC12* locus restored the WT phenotype (Fig. 1D, 1E). As expected, the cholesterol-  
149 mediated increase in the frequency of the generation of the rifamycin-tolerant population,  
150 observed in the WT strain, was reversed in the *vapC12*-null strain, underscoring the role  
151 of this putative toxin in the generation of cholesterol-induced persistence in mycobacteria

152 (Fig. 1F, S3). To gain additional insights, we performed transcriptional profiling of these  
153 strains in both glycerol only and cholesterol only media through RNAseq analysis. As  
154 expected, the transcript levels of genes involved in cholesterol metabolism, methyl-citrate  
155 cycle, and glyoxylate pathways were significantly upregulated(33, 34). The slowing  
156 down of WT Mtb in the cholesterol-rich media can be attributed to a decrease in the  
157 transcript levels of genes involved in respiration (e.g. cytochrome and ATP synthesis  
158 pathway genes). A significant decrease in the expression of genes belonging to the *esx3*  
159 locus in WT Mtb was intriguing, suggesting the possibility of iron-mediated growth  
160 modulation in the cholesterol-rich environment(35, 36). Additionally we also observed an  
161 increase in the transcript levels of DosR regulon genes in the cholesterol-rich media (Fig.  
162 1G, S4, Table S1). Despite the differences observed in the growth phenotype between  
163 H37Rv and *vapC12* mutants grown in the cholesterol-rich media, expression profiling  
164 data showed few differentially expressed genes between the samples, suggesting that a  
165 post-transcriptional regulation mechanism plays a decisive role in inducing cholesterol-  
166 mediated growth regulation in Mtb (Table S2). Since ATP depletion is one of the  
167 mechanisms through which bacteria increase their tolerance to antibiotics leading to  
168 persistence (20, 37, 38) and our RNA sequencing data also revealed differential  
169 expression of ATP synthesis pathway genes, we quantified intracellular ATP levels in  
170 glycerol- and cholesterol-grown BCG cultures. Compared with the glycerol-grown BCG  
171 culture, the cholesterol-grown BCG culture demonstrated a 25-fold decrease in  
172 intracellular ATP levels. This cholesterol-specific depletion of intracellular ATP depends  
173 on the presence of *vapC12* gene (Fig. 1H).

#### 174 **VapC12 ribonuclease toxin targeting proT is essential for cholesterol-mediated** 175 **growth regulation in Mtb**

176 Because the VapBC family of toxins targets RNAs(39-41), the presence of proT-tRNA  
177 (proT) gene upstream to *vapC12* gene was intriguing. Thus, we hypothesized that this  
178 proT-tRNA can be one of the substrates for the toxin (Fig. 2A). As predicted, we  
179 observed a cholesterol specific decrease in the proT transcript levels in wild type strain  
180 (Fig. S5) and this cholesterol specific decrease was not observed in a *vapC12* null strain,  
181 suggesting, proT tRNA could be one of the major substrates of the VapC12 ribonuclease  
182 toxin. In order to further confirm the proT specificity, we quantified the transcript levels

183 of 10 different tRNAs that had a GC-rich anticodon sequences. Surprisingly, we found no  
184 cholesterol specific differences in the abundance of any of the tested tRNAs, emphasizing  
185 that proT is one of the major substrates of the VapC12 ribonuclease toxin (Fig. S6). To  
186 further rule out the role of slow growth rate contributing to the above phenotype, we  
187 quantified the proT transcript levels in WT Mtb culture grown in palmitate as a sole  
188 carbon source (Fig. S7) and we did not observe any difference in the proT transcript  
189 levels (Fig. 2B).

190 In contrast to the findings of previous studies(26, 42), we successfully  
191 demonstrated that WT *M. bovis* BCG strain overexpressing the putative toxin gene  
192 *vapC12* demonstrated both a decrease in the proT transcript level and a significant  
193 growth defect (Fig. 2C, 2D, 2E). Furthermore, the toxin phenotype was reversed if the  
194 *vapC12* toxin gene was co-expressed along with its cognate *vapB12* antitoxin gene (Fig.  
195 2C) (43). To further validate if proT is the substrate of VapC12 toxin, we generated  
196 recombinant His-tagged VapC12 toxin expressed and purified in a heterologous *E. coli*  
197 expression system (Fig. S8). When exposed to *in-vitro* transcribed tRNAs, namely proT  
198 and proU, the purified recombinant toxin specifically cleaved proT (Fig. 2F, 2G).  
199 Furthermore, we mutated two highly conserved aspartate residues D<sub>5</sub> and D<sub>94</sub> in the PIN  
200 domain of the toxin to alanine (Fig. S9). An aspartate (D) to alanine (A) conversion of the  
201 94<sup>th</sup> residue of VapC12 toxin failed to cleave the substrate. This inactivation of the toxin  
202 by D<sub>94</sub>A substitution may be due to its inability to bind to Mg<sup>2++</sup>, which is a critical  
203 cofactor required for its activity(39, 44). Although we used proU-tRNA (proU) as our  
204 control, we do not rule out the possibility of other tRNAs being a VapC12 substrate. A  
205 D<sub>5</sub>A substitution didn't affect the ribonuclease activity of the toxin.

206 Activation of the type II TA module is mainly due to the degradation of the  
207 corresponding antitoxin. Therefore, to study cholesterol-specific degradation of the  
208 antitoxin VapB12, we generated a strain expressing N-terminal His-tagged VapB12  
209 antitoxin and toxin VapC12 at C-terminal. In the presence of cholesterol, the antitoxin  
210 (VapB12) protein dissociated from the VapBC12 complex and degrades with time,  
211 releasing and activating the cognate toxin (Fig. 2H, 2I). The only lysine residue K<sub>19</sub> of the  
212 antitoxin lost its acetylation in the presence of cholesterol (Fig. 2J) and the de-acetylation  
213 of this lysine residue (K<sub>19</sub>) in the antitoxin protein can be the signal for cholesterol-



214 induced degradation of antitoxin and the subsequent activation of VapC12 toxin. This  
215 activation modulates cholesterol-specific growth in Mtb.(45). We validated this by LC-  
216 MS/MS wherein we observed that the lysine residue (K<sub>19</sub>) of the antitoxin protein was  
217 acetylated only in protein lysates from glycerol media (Fig. 2K). Surprisingly, the protein  
218 coverage of the anti-toxin peptides isolated from Mtb grown in cholesterol was  $\geq 95$  per  
219 cent except for the peptide LHELK with the sequence coverage of  $\geq 50 < 95$  (Fig. S10).  
220 This could be attributed to a cholesterol specific degradation of the anti-toxin (Fig. 2I).  
221 To confirm this further, we generated a recombinant *M. bovis* BCG strain overexpressing  
222 the antitoxin protein harbouring a lysine to alanine (K<sub>19</sub>A) substitution and as expected  
223 due to the absence of the lysine residue the antitoxin could not be acetylated (Fig.2J).  
224 This resulted in constitutive degradation of the antitoxin, leading to growth inhibition  
225 independent of the carbon source in mycobacteria (Fig. 2L).

### 226 **Cholesterol-dependent activation of *vapC12* toxin generates and enriches the** 227 **persister population in the Mtb culture**

228 In order to further evaluate cholesterol-induced activation of VapC12 toxin and the  
229 subsequent slowdown of Mtb growth, a log-phase culture of WT Mtb grown in either an  
230 enriched (7H9+OADC) or glycerol media was subsequently exposed to cholesterol, and  
231 the effect on bacterial growth (cfu) was assessed (Fig. 3A). Exposure to cholesterol  
232 caused a significant reduction in the Mtb growth rate (Fig. 3B), which was dependent on  
233 the presence of *vapC12* toxin gene (Fig. 3C). These results indicate a *vapC12*-mediated  
234 cholesterol-dependent reduction in Mtb growth. Compared with the glycerol media, the  
235 reduction in the growth rate was more prominent in the enriched media. We also found a  
236 reduction in the transcript levels of proT-tRNA in cholesterol-exposed Mtb, which was  
237 earlier grown in either an enriched media or glycerol media (Fig. 3D), further confirming  
238 the finding that the difference in growth is due to toxin-mediated degradation of proline-  
239 tRNA. To explore the extracellular role of VapC12 toxin in restricting the growth of fast-  
240 growing bacteria in a heterogeneous population (46, 47), we suspended a log-phase  
241 culture of the Mtb *vapC12* mutant strain separately in the spent media harvested from  
242 either the cholesterol-grown WT or *vapC12* mutant strain (Fig. 3E). A decrease in the  
243 *vapC12* mutant cfu was observed only in cultures resuspended in the supernatant isolated  
244 from the cholesterol-grown WT strain, suggesting that either VapC12 toxin directly or a



245 VapC12-dependent secretory protein selectively enriches the slow growing persister  
246 population in Mtb cultures in a cholesterol rich environment (Fig. 3F). The quantification  
247 of proT levels in these cultures further suggested that the observed phenotype was indeed  
248 due to differences in the toxin-mediated proT cleavage (Fig. 3G). Furthermore,  
249 neutralization of the toxin in WT spent media by adding a purified antitoxin resulted in  
250 an increase in the mutant CFU, similarly, the addition of purified toxin in spent media  
251 from *ΔvapC12* resulted in a dose dependent decrease in CFU of *vapC12* null strain (Fig.  
252 3H). Finally, we demonstrated that VapC12 toxin was only detected in the culture filtrate  
253 isolated from cholesterol-grown *M. bovis* BCG overexpressing Flag-tagged VapC12 and  
254 not from the glycerol-grown culture (Fig. 3I, 3J).

255 We next investigated the implications of proT degradation in cholesterol-mediated  
256 growth modulation. A Genome-wide *in-silico* analysis was performed to determine the  
257 frequency of the pro-tRNA codon in each of the Mtb gene (Fig. S11). Mycobacteria code  
258 four designated pro-tRNA (pro-T, pro-Y, pro-U, and pro-X) that incorporate the proline  
259 residue to a protein during translation. The results of the in-silico analysis revealed that  
260 pro-T and pro-Y encode 85.53% of the total proline incorporated into the Mtb H37Rv  
261 proteome, with pro-Y (CCG) and pro-T (CCC) codon usage being 63.6% and 36.4%,  
262 respectively (Fig. S11). A list of 136 Mtb genes that had at least 60% of the proline  
263 encoded by pro-T tRNA was identified (Table S3). A functional categorization revealed  
264 that proline incorporated in the PE-PGRS protein family has a significantly higher proT  
265 codon usage. In addition, a gradient in the percentage of proT codon usage was observed  
266 (Fig. S12). This led to speculation that the expression of antigenic proteins belonging to  
267 the PE-PGRS family, which contain varying number and frequency of proT, are  
268 differentially regulated in a cholesterol-rich environment. We hypothesized that through  
269 VapC12 toxin-mediated degradation of proT in cholesterol, Mtb downregulates the  
270 expression of these antigenic proT-rich PE-PGRS proteins. We selected a set of 5  
271 different PE-PGRS proteins with varying proT codon usage and found that the expression  
272 levels of PE-PGRS proteins having a higher frequency of proT decreased in Mtb grown  
273 in the cholesterol-rich media compared with that grown in a glycerol-rich media (Fig. 4A,  
274 S13). This phenotype was completely dependent on the presence of VapC12 toxin  
275 because no media-specific difference was observed in the expression of the

276 aforementioned proteins in the *vapC12*-null strain (Fig. 4A, S13). The factor *rpfA*, one of  
277 the five resuscitation-promoting factors (*rpfA-D*) of Mtb, has 53.16% of its proline  
278 encoded by proT. These rpf proteins are peptidoglycan glycosidases required for the  
279 activation of quiescent bacteria; this is an essential step for the reactivation of TB in a  
280 latently infected individual(48). In addition, *rpfA* in Mtb has been reported to be secretory  
281 through a sec-dependent pathway and speculated to be involved in modulating host  
282 during the reactivation process(49). Interestingly, we found a *vapC12*-dependent decrease  
283 in the expression of *rpfA* in a cholesterol-rich environment. We believe that the  
284 cholesterol-dependent regulation of *rpfA* levels by the VapC12 toxin can be an important  
285 mechanism through which Mtb sustains latency during infection.

286 ***vapC12*-mediated downregulation of proT-encoded proline-rich proteins are**  
287 **essential for persistence of Mtb in a guinea pig model of infection**

288 To assess the possible role of *vapC12* in the host, we first infected mouse bone  
289 marrow-derived macrophages (BMDM) with WT and *vapC12*-null strains. The null  
290 strain demonstrated increased replication in BMDM, which was abolished in the  
291 complemented strain (Fig. S13). Of note, the *vapC12*-null strain also showed similar  
292 enhanced fitness to replicate under oxidative and nitrosative stress (Fig. S14). Next, we  
293 infected guinea pigs with WT, *vapC12*-null, and complemented Mtb strains. At 7 weeks  
294 post infection, a higher bacterial load was observed in the lungs of guinea pigs infected  
295 with the *vapC12*-null strain compared with animals infected with a WT or complemented  
296 strain (Fig. 4B). A similar profile was observed in the spleen (Fig. S16). Histologic  
297 examination of the lungs of infected animals at 7 weeks post infection revealed necrotic  
298 and non-necrotic lesions with numerous infiltrating macrophages and lymphocytes (Fig.  
299 4C, D). At this time, *vapC12*-null strain infected Guinea pigs displayed an increased  
300 number of granulomas (Fig. 4C,4D, S17), which were predominantly of the non-necrotic  
301 type (Fig. 4E). This suggests a hypervirulent phenotype of the *vapC12*-null strain.  
302 Consistent with this finding, animals infected with the *vapC12*-null strain failed to induce  
303 an inflammatory response, as indicated by a decreased mRNA expression of  
304 inflammatory cytokines (Fig. 4F). Guinea pigs infected with a complemented strain had a  
305 phenotype similar to those infected with a WT strain (Fig. 4C-F).

306

307 **Discussion**

308 Chronic infections necessitate the etiologic agent to persist inside the host for extended  
309 duration. Mtb remarkably adapts to a very hostile niche by augmenting its ability to  
310 thrive inside the host for decades. The pathogen's ability to modulate host immune  
311 response and its capacity to tolerate high concentration of anti-mycobacterial drugs are  
312 key to persistence. In order to do so, Mtb senses various stage specific environmental  
313 cues and accordingly regulates the expression of various proteins that eventually help the  
314 pathogen to attain distinct phenotypes critical for long-term survival. Inside the host, Mtb  
315 encounters an extraordinary challenge of surviving on host-derived nutrients and  
316 subsequently creating a niche conducive for its own growth. Conversely, the host has  
317 developed ways and means to deprive, the unwanted guest, of critical nutrients including  
318 the much-needed carbon source. Although, we have earlier demonstrated that the  
319 utilization of host cholesterol is essential for disease persistence in tuberculosis, the role  
320 of cholesterol utilization and the subsequent mechanism leading to the above phenotype  
321 is largely not well defined.

322 We, in the current study have demonstrated that cholesterol utilization results in an  
323 increase in the frequency of generation of antibiotic persisters in mycobacteria. The  
324 above phenotype was abrogated in an Mtb ribonuclease toxin *vapC12* null strain.  
325 Mechanistically, we also identified Mtb proT tRNA as one of the substrates of the  
326 VapC12 ribonuclease toxin and that the toxin mediated modulation of the proT tRNA  
327 levels regulate antibiotic persistence in mycobacteria. Finally, using guinea pig model of  
328 Mtb infection, we demonstrated that a reduction in the frequency of generation of  
329 antibiotic persisters significantly curtailed disease persistence. According to the recently  
330 established guidelines on bacterial persistence (50), our data suggest that in tuberculosis  
331 both antibiotic as well as disease persistence, either individually or in tandem, influence  
332 the disease progression and treatment outcomes. Co-evolution for centuries has moulded  
333 Mtb to adapt and utilize host-derived fatty acid including cholesterol as a preferred  
334 carbon source (1, 51). Surprisingly, Mtb does not rely on cholesterol as sole carbon  
335 source during infection (52, 53), nonetheless, utilization of the host cholesterol has been  
336 found to be essential for long-term persistence. Although, nutrient dependent growth

337 modulation is very common (54, 55), our data for the first time reported its effect on  
338 antibiotic persistence in tuberculosis.

339 Interestingly, decrease in the expression of *esx3* loci, a type VII secretion system critical  
340 (38) for iron uptake (36, 56), during cholesterol utilization suggests that Mtb deprives  
341 itself of iron in order to restrict growth under cholesterol rich condition. We also found  
342 that the cholesterol exposed Mtb downregulates the expression of genes belonging to the  
343 electron transport chain (ETC) resulting in a sharp decline in the intracellular ATP levels.  
344 Our data is in line with similar studies implicating lower ATP concentration to disease  
345 persistence in several species of bacteria including Mtb (37, 38, 57, 58). These findings  
346 suggest that the modulation of intracellular ATP levels by a *vapC12* gene-encoded  
347 protein might have a role in cholesterol-specific growth modulation in Mtb. Obtaining  
348 mechanistic insights into pathways leading to VapC12 toxin-dependent regulation of  
349 intracellular ATP levels would be an interesting area for future research. Additionally, an  
350 increase in the transcript levels of DosR regulon genes in the cholesterol-rich media  
351 suggests that in addition to hypoxia, sensing of intracellular cholesterol by Mtb can  
352 possibly trigger the induction of DosR regulon genes in Mtb. Surprisingly, in spite of the  
353 cholesterol specific growth differences observed between the WT and the *vapC12*  
354 mutant, the differences observed in the transcript levels were very minimal implicating  
355 post-transcriptional regulation for the observed phenotype. Our finding demonstrated  
356 growth modulation specifically attributed to the abundance of proline-tRNA levels  
357 modulated by activation of VapC12 ribonuclease toxin. Studies describing tRNA  
358 dependent growth modulation have already been reported (27, 59, 60), our study  
359 describing mechanism of nutrient dependent regulation of tRNA abundance modulating  
360 growth is a novel finding.

361 Post-translational modifications (PTMs) confer diversity to regulatory mechanisms that  
362 controls various cellular pathways. Two of the most extensively studied PTMs are  
363 phosphorylation and acetylation. Together, they are known to regulate the stability and  
364 activity of proteins in both eukaryotes and prokaryotes. Lysine acetylation is known to  
365 regulate various cellular pathways conserved across species including mycobacteria (45,  
366 61). Our data also suggest that the cholesterol-mediated growth modulation is triggered  
367 by deacetylation of the only lysine residue present in the antitoxin.

368 Mechanistically, the data suggest that, in cholesterol rich environment, VapC12 toxin  
369 enriches slow-growing bacteria by selectively culling fast-growing ones in a  
370 heterogeneously growing Mtb culture. These findings unravel a new mechanism through  
371 which Mtb regulates the generation and enrichment of persisters when exposed to  
372 cholesterol, a carbon source typically available during the persistence stage of  
373 tuberculosis infection. Our findings also suggest that the proT-encoded proline-rich  
374 proteome of Mtb, including PE-PGRS proteins, have immunomodulatory properties. We  
375 predict that these PE-PGRS proteins have relatively higher expression during early stages  
376 of infection that blunts the host immune response, resulting in active growth of Mtb  
377 inside the host. After the onset of adaptive immunity, increased exposure of Mtb to host  
378 cholesterol down regulates the expression of these immunomodulatory proteins, leading  
379 to enhanced pro-inflammatory cytokine secretion that triggers granuloma formation and  
380 containment of the infection.

381 Thus, these proT codon rich proteins belonging to the PE-PGRS proteins induce a pro-  
382 inflammatory cytokine response and a down-regulation of these proteins during chronic  
383 phase of infection is critical for long-term survival and persistence. A recent publication  
384 in support of this hypothesis suggest how ubiquitination of one of the proT enriched  
385 proline codon protein belonging to the PE-PGRS family was identified as signal for the  
386 host to eliminate the pathogen(62). Our findings suggest that Mtb through the pathways  
387 that we have identified downregulates the expression of such antigens for its long-term  
388 survival inside the host. VapC12-mediated proT codon-based differential expression of  
389 various Mtb proteins, including PE-PGRS, is a novel finding and can be a pathogen-  
390 driven immunomodulatory mechanism critical for the maintenance of the persistence  
391 state during mycobacterial infection. While, pathogen rewiring their metabolic pathways  
392 for disease persistence is quite well studied (63, 64), there are limited studies pertaining  
393 to the modulation of host immune response by temporospatial expression of Mtb surface  
394 antigens contributing towards disease persistence. Our study suggests that both the  
395 growth modulation and differential expression of surface antigens by Mtb together  
396 contribute towards disease persistence. This information could be used for designing  
397 better and more efficient vaccine against tuberculosis.

398 In light of our current findings, it will be very intriguing to study the role of PE-PGRS  
399 proteins in modulating the host response and their role in the disease progression during  
400 Mtb infection. Furthermore, functional characterization of proT tRNA-encoded proline-  
401 rich proteins and their implications in the stage-specific replication and growth rate of  
402 Mtb inside the host should be explored.

403 The findings support our hypothesis that the VapC12 toxin acts as a molecular switch that  
404 regulates growth in the presence of cholesterol. Because an actively growing Mtb culture  
405 is always heterogeneous and has individual bacteria growing at different rates, the rate of  
406 growth is directly proportional to the level of the VapBC12 TA protein accumulated in  
407 the cytoplasm. The fate of each bacterium after cholesterol exposure is dictated by the  
408 intracellular concentration of the activated toxin generated in an individual cell.  
409 Depending on the toxin level, bacteria either gets eliminated or slows down, resulting in  
410 an enrichment of the persister population when exposed to a cholesterol-rich environment  
411 (Fig. S18). Furthermore, the extracellular presence of this toxin ensures clearance of any  
412 rapidly dividing mutant bacteria generated due to spontaneous incorporation of a genetic  
413 lesion. This is the first study to identify a novel mechanism of cholesterol-dependent  
414 stochastic enrichment of slow-growing Mtb during mycobacterial infection.

415 These findings will help identify novel mechanism of generation of antibiotic persistence  
416 and define targets against persister population. Approaches targeting persister population  
417 will enhance the rate of clearance of the pathogen resulting in a significant reduction in  
418 the duration of treatment. This will help in significantly reducing the risk associated with  
419 the current extended regimen extending from six months to two years. So, we have  
420 empirically demonstrated that both antibiotic and disease persistence contributes towards  
421 chronic Mtb infection and targeting pathways essential for both could potentially shorten  
422 the treatment regimen. The current finding holds significance as better understanding of  
423 the disease persistence and targeting Mtb persister population as a therapeutic strategy  
424 will open new paradigms in tuberculosis treatment.

425

426

427

428



## 429 References

- 430 1. B. C. VanderVen *et al.*, Novel inhibitors of cholesterol degradation in Mycobacterium  
431 tuberculosis reveal how the bacterium's metabolism is constrained by the intracellular  
432 environment. *PLoS pathogens* **11**, e1004679 (2015).
- 433 2. M. Pai *et al.*, Tuberculosis. *Nature reviews. Disease primers* **2**, 16076 (2016).
- 434 3. N. H. Smith, R. G. Hewinson, K. Kremer, R. Brosch, S. V. Gordon, Myths and misconceptions:  
435 the origin and evolution of Mycobacterium tuberculosis. *Nature Reviews Microbiology* **7**, 537  
436 (2009).
- 437 4. N. D. Wolfe, C. P. Dunavan, J. Diamond, Origins of major human infectious diseases. *Nature* **447**,  
438 279 (2007).
- 439 5. N. Dhar, J. McKinney, G. Manina, Phenotypic Heterogeneity in Mycobacterium tuberculosis.  
440 *Microbiology spectrum* **4**, (2016).
- 441 6. Y. Zhang, W. W. Yew, M. R. Barer, Targeting persisters for tuberculosis control. *Antimicrobial*  
442 *agents and chemotherapy* **56**, 2223-2230 (2012).
- 443 7. M. C. Chao, E. J. Rubin, Letting sleeping dogs lie: does dormancy play a role in tuberculosis?  
444 *Annual review of microbiology* **64**, 293-311 (2010).
- 445 8. R. A. Fisher, B. Gollan, S. Helaine, Persistent bacterial infections and persister cells. *Nature*  
446 *Reviews Microbiology* **15**, 453 (2017).
- 447 9. W. McDermott, Microbial persistence. *The Yale journal of biology and medicine* **30**, 257 (1958).
- 448 10. W. McDermott, R. M. McCune Jr, R. Tompsett, Dynamics of antituberculous chemotherapy.  
449 *American Review of Tuberculosis and Pulmonary Diseases* **74**, 100-108 (1956).
- 450 11. N. Q. Balaban, K. Gerdes, K. Lewis, J. D. McKinney, A problem of persistence: still more  
451 questions than answers? *Nature Reviews Microbiology* **11**, 587 (2013).
- 452 12. Y. Wu, M. Vulić, I. Keren, K. Lewis, Role of oxidative stress in persister tolerance. *Antimicrobial*  
453 *agents and chemotherapy* **56**, 4922-4926 (2012).
- 454 13. A. Brauner, O. Fridman, O. Gefen, N. Q. Balaban, Distinguishing between resistance, tolerance  
455 and persistence to antibiotic treatment. *Nature reviews. Microbiology* **14**, 320-330 (2016).
- 456 14. S. Helaine, E. Kugelberg, Bacterial persisters: formation, eradication, and experimental systems.  
457 *Trends in microbiology* **22**, 417-424 (2014).
- 458 15. A. K. Pandey, C. M. Sasseti, Mycobacterial persistence requires the utilization of host  
459 cholesterol. *Proceedings of the National Academy of Sciences of the United States of America* **105**,  
460 4376-4380 (2008).
- 461 16. M. D. Miner, J. C. Chang, A. K. Pandey, C. M. Sasseti, D. R. Sherman, Role of cholesterol in  
462 Mycobacterium tuberculosis infection. (2009).
- 463 17. V. Singh *et al.*, Mycobacterium tuberculosis-driven targeted recalibration of macrophage lipid  
464 homeostasis promotes the foamy phenotype. *Cell host & microbe* **12**, 669-681 (2012).
- 465 18. K. H. zu Bentrup, D. G. Russell, Mycobacterial persistence: adaptation to a changing  
466 environment. *Trends in microbiology* **9**, 597-605 (2001).
- 467 19. D. G. Russell *et al.*, Mycobacterium tuberculosis wears what it eats. *Cell host & microbe* **8**, 68-76  
468 (2010).
- 469 20. H. Y. Cheng *et al.*, Toxin GhoT of the GhoT/GhoS toxin/antitoxin system damages the cell  
470 membrane to reduce adenosine triphosphate and to reduce growth under stress. *Environmental*  
471 *microbiology* **16**, 1741-1754 (2014).
- 472 21. A. Harms, D. E. Brodersen, N. Mitarai, K. Gerdes, Toxins, Targets, and Triggers: An Overview of  
473 Toxin-Antitoxin Biology. *Molecular cell* **70**, 768-784 (2018).
- 474 22. N. Q. Balaban, J. Merrin, R. Chait, L. Kowalik, S. Leibler, Bacterial persistence as a phenotypic  
475 switch. *Science* **305**, 1622-1625 (2004).
- 476 23. D. S. Coray, N. E. Wheeler, J. A. Heinemann, P. P. Gardner, Why so narrow: distribution of anti-  
477 sense regulated, type I toxin-antitoxin systems compared with type II and type III systems. *RNA*  
478 *biology* **14**, 275-280 (2017).
- 479 24. N. Goeders, R. Chai, B. Chen, A. Day, G. P. Salmond, Structure, evolution, and functions of  
480 bacterial type III toxin-antitoxin systems. *Toxins* **8**, 282 (2016).
- 481 25. R. Leplae *et al.*, Diversity of bacterial type II toxin-antitoxin systems: a comprehensive search and  
482 functional analysis of novel families. *Nucleic acids research* **39**, 5513-5525 (2011).



- 483 26. H. R. Ramage, L. E. Connolly, J. S. Cox, Comprehensive functional analysis of Mycobacterium  
484 tuberculosis toxin-antitoxin systems: implications for pathogenesis, stress responses, and  
485 evolution. *PLoS genetics* **5**, e1000767 (2009).
- 486 27. K. Winther, J. J. Tree, D. Tollervey, K. Gerdes, VapCs of Mycobacterium tuberculosis cleave  
487 RNAs essential for translation. *Nucleic acids research* **44**, 9860-9871 (2016).
- 488 28. B. A. Ahidjo *et al.*, VapC toxins from Mycobacterium tuberculosis are ribonucleases that  
489 differentially inhibit growth and are neutralized by cognate VapB antitoxins. *PloS one* **6**, e21738  
490 (2011).
- 491 29. R. Page, W. Peti, Toxin-antitoxin systems in bacterial growth arrest and persistence. *Nature*  
492 *chemical biology* **12**, 208 (2016).
- 493 30. F. Hayes, Toxins-antitoxins: plasmid maintenance, programmed cell death, and cell cycle arrest.  
494 *Science* **301**, 1496-1499 (2003).
- 495 31. Y. Yamaguchi, M. Inouye, Regulation of growth and death in Escherichia coli by toxin-antitoxin  
496 systems. *Nature Reviews Microbiology* **9**, 779 (2011).
- 497 32. J. E. Griffin *et al.*, High-resolution phenotypic profiling defines genes essential for mycobacterial  
498 growth and cholesterol catabolism. *PLoS pathogens* **7**, e1002251 (2011).
- 499 33. J. D. McKinney *et al.*, Persistence of Mycobacterium tuberculosis in macrophages and mice  
500 requires the glyoxylate shunt enzyme isocitrate lyase. *Nature* **406**, 735-738 (2000).
- 501 34. E. J. Munoz-Elias, A. M. Upton, J. Cherian, J. D. McKinney, Role of the methylcitrate cycle in  
502 Mycobacterium tuberculosis metabolism, intracellular growth, and virulence. *Molecular*  
503 *microbiology* **60**, 1109-1122 (2006).
- 504 35. M. S. Siegrist *et al.*, Mycobacterial Esx-3 is required for mycobactin-mediated iron acquisition.  
505 *Proceedings of the National Academy of Sciences of the United States of America* **106**, 18792-  
506 18797 (2009).
- 507 36. J. M. Tufariello *et al.*, Separable roles for Mycobacterium tuberculosis ESX-3 effectors in iron  
508 acquisition and virulence. *Proceedings of the National Academy of Sciences* **113**, E348-E357  
509 (2016).
- 510 37. Y. Shan *et al.*, ATP-dependent persister formation in Escherichia coli. *mBio* **8**, e02267-02216  
511 (2017).
- 512 38. B. P. Conlon *et al.*, Persister formation in Staphylococcus aureus is associated with ATP  
513 depletion. *Nature microbiology* **1**, 16051 (2016).
- 514 39. V. L. Arcus, J. L. McKenzie, J. Robson, G. M. Cook, The PIN-domain ribonucleases and the  
515 prokaryotic VapBC toxin-antitoxin array. *Protein engineering, design & selection : PEDS* **24**, 33-  
516 40 (2011).
- 517 40. J. Robson, J. L. McKenzie, R. Cursons, G. M. Cook, V. L. Arcus, The vapBC operon from  
518 Mycobacterium smegmatis is an autoregulated toxin-antitoxin module that controls growth via  
519 inhibition of translation. *Journal of molecular biology* **390**, 353-367 (2009).
- 520 41. K. S. Winther, K. Gerdes, Enteric virulence associated protein VapC inhibits translation by  
521 cleavage of initiator tRNA. *Proceedings of the National Academy of Sciences* **108**, 7403-7407  
522 (2011).
- 523 42. S. Agarwal *et al.*, System wide analysis unravels differential regulation and in vivo essentiality of  
524 VapBC TA systems from Mycobacterium tuberculosis. *The Journal of infectious diseases*,  
525 (2018).
- 526 43. S. Ehrt *et al.*, Controlling gene expression in mycobacteria with anhydrotetracycline and Tet  
527 repressor. *Nucleic acids research* **33**, e21-e21 (2005).
- 528 44. V. L. Arcus, K. Bäckbro, A. Roos, E. L. Daniel, E. N. Baker, Distant structural homology leads to  
529 the functional characterization of an archaeal PIN domain as an exonuclease. *Journal of Biological*  
530 *Chemistry* **279**, 16471-16478 (2004).
- 531 45. C. Caron, C. Boyault, S. Khochbin, Regulatory cross-talk between lysine acetylation and  
532 ubiquitination: role in the control of protein stability. *Bioessays* **27**, 408-415 (2005).
- 533 46. I. Kolodkin-Gal, H. Engelberg-Kulka, The extracellular death factor: physiological and genetic  
534 factors influencing its production and response in Escherichia coli. *Journal of bacteriology* **190**,  
535 3169-3175 (2008).

- 536 47. A. Nigam, S. Kumar, H. Engelberg-Kulka, Quorum Sensing Extracellular Death Peptides Enhance  
537 the Endoribonucleolytic Activities of Mycobacterium tuberculosis MazF Toxins. *mBio* **9**, e00685-  
538 00618 (2018).
- 539 48. B. D. Kana *et al.*, The resuscitation-promoting factors of Mycobacterium tuberculosis are required  
540 for virulence and resuscitation from dormancy but are collectively dispensable for growth in vitro.  
541 *Molecular microbiology* **67**, 672-684 (2008).
- 542 49. I. Uhía, N. Krishnan, B. D. Robertson, Characterising resuscitation promoting factor fluorescent-  
543 fusions in mycobacteria. *BMC microbiology* **18**, 30 (2018).
- 544 50. N. Q. Balaban *et al.*, Definitions and guidelines for research on antibiotic persistence. *Nature*  
545 *Reviews Microbiology*, 1 (2019).
- 546 51. C. M. Sassetti, E. J. Rubin, Genetic requirements for mycobacterial survival during infection.  
547 *Proceedings of the National Academy of Sciences of the United States of America* **100**, 12989-  
548 12994 (2003).
- 549 52. L. P. de Carvalho *et al.*, Metabolomics of Mycobacterium tuberculosis reveals compartmentalized  
550 co-catabolism of carbon substrates. *Chemistry & biology* **17**, 1122-1131 (2010).
- 551 53. D. G. Russell, Mycobacterium tuberculosis and the intimate discourse of a chronic infection.  
552 *Immunological reviews* **240**, 252-268 (2011).
- 553 54. K. Potrykus, M. Cashel, (p) ppGpp: still Magical? *Annu. Rev. Microbiol.* **62**, 35-51 (2008).
- 554 55. S. Iyer, D. Le, B. R. Park, M. Kim, Distinct mechanisms coordinate transcription and translation  
555 under carbon and nitrogen starvation in Escherichia coli. *Nature microbiology* **3**, 741 (2018).
- 556 56. M. S. Siegrist *et al.*, Mycobacterial Esx-3 is required for mycobactin-mediated iron acquisition.  
557 *Proceedings of the National Academy of Sciences* **106**, 18792-18797 (2009).
- 558 57. S. P. Rao, S. Alonso, L. Rand, T. Dick, K. Pethe, The protonmotive force is required for  
559 maintaining ATP homeostasis and viability of hypoxic, nonreplicating Mycobacterium  
560 tuberculosis. *Proceedings of the National Academy of Sciences* **105**, 11945-11950 (2008).
- 561 58. P. A. Black *et al.*, Energy metabolism and drug efflux in Mycobacterium tuberculosis.  
562 *Antimicrobial agents and chemotherapy* **58**, 2491-2503 (2014).
- 563 59. J. W. Cruz *et al.*, Growth-regulating Mycobacterium tuberculosis VapC-mt4 toxin is an  
564 isoacceptor-specific tRNase. *Nature communications* **6**, 7480 (2015).
- 565 60. L. R. Walling, J. S. Butler, Homologous VapC toxins inhibit translation and cell growth by  
566 sequence-specific cleavage of tRNA<sup>fMet</sup>. *Journal of bacteriology* **200**, e00582-00517 (2018).
- 567 61. A. Sakatos *et al.*, Posttranslational modification of a histone-like protein regulates phenotypic  
568 resistance to isoniazid in mycobacteria. *Science advances* **4**, eaao1478 (2018).
- 569 62. Q. Chai *et al.*, A Mycobacterium tuberculosis surface protein recruits ubiquitin to trigger host  
570 xenophagy. *Nature communications* **10**, 1973 (2019).
- 571 63. I. V. Ene, S. Brunke, A. J. Brown, B. Hube, Metabolism in fungal pathogenesis. *Cold Spring*  
572 *Harbor perspectives in medicine* **4**, a019695 (2014).
- 573 64. W. Eisenreich, T. Rudel, J. Heesemann, W. Goebel, How Viral and Intracellular Bacterial  
574 Pathogens Reprogram the Metabolism of Host Cells to Allow Their Intracellular Replication.  
575 *Frontiers in cellular and infection microbiology* **9**, (2019).
- 576  
577  
578

## 579 Acknowledgement

580 This study was supported by the India-Singapore grant jointly sponsored by the  
581 Department of Science and Technology (DST), India and A\*STAR, Singapore to AKP  
582 (#INT/Sin/P-08/2015) and AS (#1518224018), respectively. Ramalingaswami fellowship  
583 (#BT/RLF/Re-entry/45/2010) and RGYI grant (#BT/PR6556/GBD/27/459/2012) from  
584 Department of Biotechnology, Govt. of India and Intramural funding by THSTI to A.K.P  
585 is acknowledged. S.T. is funded by research fellowship from ICMR (2012/HRD-119-  
586 31498). We thank the Director, ICGEB, and staff TACF, ICGEB, New Delhi for use of  
587 the BSL3 facility. Assistance of Mr. Sudesh Rathaor for animal experiments, Mr. Surjeet

588 Yadav for lab maintenance and Dr. Ashok Mukherjee for histopathological analysis is  
589 acknowledged.

#### 590 **Authors Contributions**

591 A.K.P and S.T. designed the experiments. S.T and M.P. performed the experiments.  
592 C.S. purified the recombinant proteins. R.K. and D.D. performed bioinformatic  
593 analysis. J.L, D.C, M.P, A.S performed RNA sequencing and analysed the data. R.G.  
594 performed and analysed Mass spectrometry. S.T, A.S and A.K.P analysed the data.  
595 S.T. and A.K.P wrote the manuscript with contributions from all co-authors. A.K.P.  
596 conceived the idea and supervised the overall study.

597

598

#### 599 **Materials and Methods**

600

##### 601 **Bacterial Strains and culture.**

602 *Mycobacterium tuberculosis* mutants were derived from strain H37Rv using homologous  
603 recombination between the suicide plasmid and bacterial genome. 1000bp flanking  
604 regions of the target gene, Rv1720c (*vapC12*) were cloned in pJM1 suicide vector and  
605 electroporated in H37Rv competent cells using standard protocol from *Mycobacterium*  
606 *tuberculosis* protocols (Tanya Parish & Neil G. Stroker). The strains were maintained on  
607 Middlebrook 7H11 agar or 7H9 broth (Difco™ Middlebrook 7H11 Agar,283810 and  
608 7H9 broth,271310) supplemented with 10% OADC enrichment. Hygromycin were added  
609 at 50ug/ml respectively. To complement *vapC12* mutant, the lox-flanked chromosomal  
610 hygromycin-resistance gene was excised by expression of Cre recombinase. This strain  
611 was transformed with pJEB402 harboring the Rv1720c-1721c (*vapBC12*) genes. For  
612 growth on defined carbon sources, strains were grown in “minimal media” (0.5 g/L  
613 asparagine, 1 g/L KH<sub>2</sub>PO<sub>4</sub>, 2.5 g/L Na<sub>2</sub>HPO<sub>4</sub>, 50mg/L ferric ammonium citrate, 0.5g/L  
614 MgSO<sub>4</sub>\*7H<sub>2</sub>O, 0.5mg/L CaCl<sub>2</sub>, 0.1 mg/L ZnSO<sub>4</sub>) containing 0.1% glycerol (v/v) or  
615 0.01% cholesterol (w/v) and 50mg/ml of Sodium palmitate. Growth was determined by  
616 CFU plating at different time points on 7H11 with 10 percent OADC plates.

##### 617 **Growth curve**

618 The log phase cultures of wild type H37Rv,  $\Delta$ *vapC12*, and  $\Delta$ *vapC12:vapBC12* strains  
619 were washed with PBST twice and inoculated in minimal media with 0.1 per cent  
620 glycerol and 0.01 per cent cholesterol respectively at an absorbance of 0.005. The  
621 aliquots of the cultures were taken at different time points and plated on 7H11+OADC  
622 plates for bacterial enumeration.

623 **Resazurin based metabolic activity assay**

624 The log phase culture of wild type H37Rv, *ΔvapC12* and *ΔvapC12:vapBC12* strains of  
625 0.5 OD were washed with PBST twice, and OD<sub>600</sub> was set to 0.05 in glycerol and  
626 cholesterol media. These cultures were serially diluted in the respective media in 96 well  
627 plate. The experiment was done in duplicate and both the plates were incubated at 37<sup>0</sup>C  
628 for five days before PrestoBlue cell viability reagent (Invitrogen catalogue no. A13261)  
629 was added to each well in one set of the plates. The plates were incubated for another two  
630 days. The fluorescence read-out of plate with PrestoBlue was taken at 570/585nm using a  
631 Synergy HTX Multi-Mode Microplate Reader. For bacterial enumeration in each well  
632 CFU plating was done from plate with no Prestoblue. For determining the average  
633 metabolic activity, the total fluorescence recorded was normalized for the number of  
634 bacteria in the corresponding well.

635 **Antibiotic kill curve.**

636 The log phase culture of wild type H37Rv, *vapC12* mutant and *ΔvapC12:vapBC12*  
637 strains grown in 7H9 enriched media were washed with PBST twice and inoculated in  
638 glycerol and cholesterol media at an absorbance of 0.05. The cultures were allowed to  
639 grow for 4 days before being treated with 5X MIC of rifamycin. Bacterial enumeration  
640 was performed through CFU plating of cultures on 7H11+OADC plates at various time  
641 points. The kill curve was plotted by calculating the percent survival.

642 **In-vitro stress assay**

643 The log phase culture of wild type H37Rv and *vapC12* mutant strains were washed with  
644 PBST twice and inoculated at an absorbance of 0.1 in 7H9 enriched media for each stress  
645 condition keeping an un-treated control. The survival was plotted by CFU plating at  
646 different time points post treatment for different stress conditions viz., Oxidative (5mM  
647 H<sub>2</sub>O<sub>2</sub> for 6hrs), Nitrosative (200μM DETA-NO for 24hrs).

648 **Bone marrow derived macrophages**

649 Bone marrow-derived macrophages (BMM) were isolated by culturing bone marrow cells  
650 from C57BL6 mice in DMEM containing 10% FBS, 2mM glutamine, 10% L929-  
651 conditioned media, and 10μg/ml ciprofloxacin for 5 days. Approximately 24 hours prior  
652 to infection, differentiated BMM were detached and seeded on a 24-well tissue culture  
653 plate at 5x 10<sup>5</sup> cells/well in the same media lacking antibiotic. Macrophages were

654 infected with different strains of *M. tuberculosis* at a MOI of 1 for 4hrs at 37°C and 5  
655 percent carbon dioxide. Extracellular bacteria were removed by washing three times with  
656 warm PBS. Intracellular bacteria were quantified by lysing the cells with 0.01% Triton-  
657 X100 (Sigma, CAS:9002-93-1) at the indicated time points and plating dilutions on 7H11  
658 agar.

### 659 **RNA sequencing material and methods**

660 Log phase cultures of H37Rv and *ΔvapC12* were washed with PBST twice and  
661 inoculated in Glycerol and Cholesterol media at an absorbance of 0.005. RNA was  
662 isolated from the cultures at day4 using Qiagen RNaeasy Minikit according to  
663 manufacturer's protocols (Qiagen 74104). The RNA was DNase treated using Turbo  
664 DNA free kit using manufacturer's protocol (Thermo Fischer scientific) to remove any  
665 genomic DNA contamination. All Mycobacterial total RNAs were analyzed using an  
666 Agilent Bioanalyser (Agilent, Santa Clara, CA, USA) for quality assessment with RNA  
667 Integrity Number (RIN) range of 5.6 to 9.7 and a median of 7.5. Ribosomal RNA (rRNA)  
668 were depleted from 500ng of bacterial RNA using RiboMinus<sup>™</sup> Bacteria transcriptome  
669 isolation kit (Invitrogen Thermo Fisher Scientific Waltham, MA, USA), according to  
670 manufacturer's protocol. cDNA libraries were prepared from the resultant rRNA depleted  
671 RNA and 1 ul of a 1:500 dilution of ERCC RNA Spike in Controls (Ambion® Thermo  
672 Fisher Scientific, Waltham, MA, USA) using Lexogen SENSE Total RNA-Seq Library  
673 Prep Kit (Lexogen GmnH, Vienna, Austria) according to manufacturer's protocol except  
674 with 21 PCR cycles. The length distribution of the cDNA libraries was monitored using a  
675 DNA High Sensitivity Reagent Kit on the Perkin Elmer Labchip (Perkin Elmer,  
676 Waltham, MA, USA). All samples were subjected to an indexed paired-end sequencing  
677 run of 2x51 cycles on an Illumina HiSeq 2000 system (Illumina, San Diego, CA, USA)  
678 (16 samples/lane). Raw reads (FASTQ files) were mapped to the *M. tuberculosis* H37Rv  
679 (GenBank accession AL123456) using bowtie2 using default parameters. The gene  
680 counts were then counted using featureCounts (part of the Subread package) using the  
681 genome annotations provided in the GenBank file. The gene counts were then used in  
682 DESeq2 for differential gene expression analysis. Multiple testing correction was  
683 performed using the method of Benjamini and Hochberg. P values < 0.05 were deemed to



684 be statistically significant. Computations were done using the R statistical language  
685 version 3.3.1.

### 686 **Quantitative RT- PCR**

687 Comparative qRT-PCR was done from RNA isolated from various strains in different  
688 experimental conditions. The RNA isolation was done from culture using RNaeasy  
689 Minikit according to manufacturer's protocols. (Qiagen 74104). The RNA was DNase  
690 treated using Turbo DNA free kit according to manufacturer's protocol (Thermo Fischer  
691 scientific) for making cDNA using Accuscript hi-fidelity cDNA synthesis kit (Agilent).  
692 The qRT-PCR was set up using brilliant III ultra-fast SYBRgreen qPCR master mix in  
693 Mx3005P qPCR system Agilent. The primers used are listed in Table S4. The data  
694 analysis was done using MxPro software.

### 695 **VapC12 expression and protein purification.**

696 *vapC12* was cloned in pET28a vector using primers sequence listed in Table S4. The  
697 SDM mutants D5:A and D94:A were generated by *dpn1* treatment. The clones were  
698 transformed in *E. coli Rosetta* cells. Briefly, the overnight culture was inoculated in 1 L  
699 of fresh LB media (1:100) supplemented with 100 µg/mL of kanamycin and allowed to  
700 grow until the optical density at 600 nm reached ~0.5. The culture was then induced with  
701 1 mM IPTG and allowed to grow for overnight at 37°C. Cells were harvested by  
702 centrifugation at 6000 × g for 10 minutes and checked for expression of wild-type or  
703 mutant rRv1720c by SDS-PAGE. Most of the target protein was present in the pellet as  
704 inclusion bodies (IBs). Isolation of pure IBs containing rRv1720c was performed by  
705 sonication and several washing steps (Singh et al., 2005).

706 Purified rRv1720c IBs (1 mL) were solubilized in 9 mL buffer [[50 mM Tris-HCl, pH  
707 8.0, 300 mM NaCl, 10 mM β-mercaptoethanol, 8 M Urea] and incubated at room  
708 temperature for 1 h, followed by centrifugation at 15,000 × g for 20 m at 10°C. The  
709 supernatant obtained post-centrifugation was used for purification recombinant Rv1720c  
710 protein, by immobilized metal ion affinity chromatography (IMAC) using HisTrap FF  
711 column (GE Healthcare Buckinghamshire, UK), in denaturing condition. Protein was  
712 eluted using buffer [50 mM Tris-HCl, pH 8.0, 300 mM NaCl, 10 mM β-  
713 mercaptoethanol, 8 M Urea, 250 mM Imidazole]. Denatured purified protein was

714 refolded by diluting it in a pulsatile manner in refolding buffer [100 mM Phosphate  
715 buffer, pH 6.4, 300 mM NaCl, 5 mM  $\beta$ -mercaptoethanol] at 4°C with constant stirring.  
716 The refolded target protein sample was centrifuged at 24,000  $\times$  g for 30 m at 4°C and the  
717 supernatant containing refolded active protein was concentrated and dialyzed three times  
718 against buffer [100 mM Phosphate buffer, pH 6.4, 300 mM NaCl, 5 mM  $\beta$ -  
719 mercaptoethanol]. The final buffer exchange of protein to buffer [100 mM Phosphate  
720 buffer, pH 6.4, 300 mM NaCl, 10% glycerol] was performed by PD10 desalting column  
721 (GE Healthcare Buckinghamshire, UK), as per manufacturer's protocol. Protein was  
722 quantitated by bicinchoninic acid assay (Thermo Scientific Pierce, Rockford, IL, USA)  
723 and analyzed with SDS-PAGE, and confirmed by Western blotting, using anti-His  
724 monoclonal antibody (Cell Signaling Technology, Inc., MA, USA). Similar protocol was  
725 followed for purification rRv1720cD<sub>5A</sub> and rRv1720cD<sub>94A</sub>.

726 Also, *vapB12* cloned in pET28a *E. coli Rosetta* cells, was purified from supernatant of  
727 lysed induced cells using Hispur Cobalt purification kit, 3ml (Thermo Scientific, 90092).

#### 728 **In-vitro transcription of tRNA.**

729 The tRNAs were transcribed using Megascript kit (Invitrogen, AM1334) according to  
730 manufacturer's protocol, which is followed by phenol chloroform extraction and  
731 isopropanol precipitation for purified transcript. The primers used for in-vitro  
732 transcription are listed in Table S4.

#### 733 **In-vitro tRNA cleavage assay.**

734 In-vitro RNA cleavage assay was performed using tRNAs produced via T7 transcription.  
735 Cleavage reactions using 3 pmol of tRNA were incubated with 30 pmol of recombinant  
736 proteins (rRv1720c, rRv1720cD<sub>5A</sub> and rRv1720cD<sub>94A</sub>) and at 37°C for 3hours in tRNA  
737 cleavage buffer (10 mM HEPES (pH 7.5), 15 mM potassium chloride, 3 mM magnesium  
738 chloride and 10% glycerol).The samples were mixed with 2X formamide gel loading  
739 buffer (95% w/v formamide, 50 mM EDTA) and incubated at 95°C for 5 mins before  
740 running on 3% agarose gel. The bands were visualized using ethidium bromide and  
741 exposing the gel to UV light.

742

743



744 **Persister enrichment assay**

745 The log phase culture of wild type H37Rv and *ΔvapC12* strains were washed with PBST  
746 and an OD of 0.005 was set in 7H9 enriched media, Glycerol and cholesterol media. The  
747 cultures were washed after four days and fresh cholesterol media was added in all the  
748 tubes. Bacterial enumeration was done by CFU plating on 7H11+OADC plates at  
749 different time points.

750 **Spent media preparation**

751 The log phase culture of H37Rv and *ΔvapC12* were washed with PBST and inoculated at  
752 an OD of 0.005 in cholesterol media, the cultures were grown for a week at 37°C in an  
753 incubator shaker. The cultures were pelleted down and the supernatant was filtered  
754 through 0.2µm filter. The spent cholesterol supernatant of both the strains were used for  
755 further experiments.

756 For preparing heat inactivated supernatant, the spent media was exposed to 95°C for 30  
757 minutes before being added to the cultures.

758 **Spent media experiment**

759 The log phase culture of *ΔvapC12* was washed and inoculated in cholesterol media at an  
760 OD of 0.005 in triplicates, the cultures were grown for 4 days after which the culture  
761 were washed with PBST and re-suspended in spent H37Rv cholesterol supernatant,  
762 H37Rv cholesterol spent supernatant media supplemented with purified toxin or  
763 antitoxin, *ΔvapC12* cholesterol spent supernatant according to the experiment, and fresh  
764 cholesterol. Bacterial enumeration was done by CFU plating on 7H11+OADC plates at  
765 different time points.

766 **Culture filtrate experiment**

767 *vapB12*(Anti-toxin) and *vapC12*(Toxin) were cloned as an operon in pMV261 kanamycin  
768 vector with C-terminal flag tag using primers listed in Table S4. The clone was  
769 electroporated in *M.bovis* BCG and maintained in 7H9 enriched media. The log phase  
770 culture of C-terminal flag tagged BCG:*vapBC12* was washed with PBST twice and  
771 inoculated in glycerol and cholesterol media at an OD of 0.5 and allowed to grow for 48  
772 hours. Cultures were pelleted down and supernatant was filtered through 0.2µm filter.  
773 The supernatant was precipitated with 5 percent TCA overnight at 4°C and centrifuged in  
774 oak ridge tubes at 12000rpm for 20 minutes at 4°C. The pellet thus obtained was washed

775 twice with ice-cold acetone and was allowed to dry and re-suspended in 1X laemmli  
776 buffer. The samples were run on 15 percent PAGE and developed with rabbit anti-flag  
777 antibody (Sigma, catalogue no. F7425). The samples were also blotted against Ag85B  
778 antibody (Abcam, ab43019) and Hsp65 antibody (A kind gift from Dr. Vinay K.  
779 Nandicoori) as a positive and negative control respectively.

#### 780 **Anti-toxin degradation experiment**

781 *vapBC12* operon with a N-terminal His tag was cloned in pMV261 vector. The clone was  
782 electroporated in *M. bovis* BCG. The culture was maintained in 7H9 enriched media. The  
783 log phase culture was washed with PBST twice and inoculated in glycerol and cholesterol  
784 media at an OD of 0.5. Aliquots of culture were taken out, washed and lysed in PBS at  
785 different time points. (4hours, 6hours, 24hours,48hours) post inoculation. The lysates  
786 were run on a 15% PAGE and developed using monoclonal anti-His antibody (Biospecs,  
787 BTL1010) with super signal west femto maximum sensitivity substrate (Thermo  
788 Scientific, 34095).

#### 789 **PE-PGRS/rpf A blots**

790 All the selected PE-PGRS genes along with the *rpfA* (with high proT and high proY  
791 codon usage) were cloned in pMV261 using primers listed in Table S4. The proteins  
792 were translationally fused with His-tag at the N-terminal by incorporating bases encoding  
793 His-tag in Forward cloning primers. The clones were transformed in BCG and the  
794 cultures were maintained in 7H9 enriched media. The log phase culture of the constructs  
795 was washed twice with PBST and inoculated at an OD of 0.005 in glycerol and  
796 cholesterol media. The cultures were allowed to grow till an OD of 0.8 and then were  
797 pelleted, washed and lysed in PBS. The samples were run on a 10 % SDS-PAGE gel and  
798 developed with anti-His antibody (Biospecs, BTL1010).

#### 799 **In-vivo animal experiments**

800 The animal experiments were approved by the animal ethics committee of ICGEB  
801 (approval no. IAEC/THSTI/2015-1)The animal experiments were performed in  
802 accordance with guidelines of Committee for purpose of control and supervision of  
803 experiments on animals (CPCSEA, Govt. of India). The pathogenicity of *vapC12* mutant  
804 strain was checked by infecting 3-4 weeks old Hartley strain of female guinea pig (200-  
805 300gm). The guinea pigs were infected with 100 bacilli of each strain via aerosol route

806 using log phase culture (OD 0.8 to1) of various Mtb strains. For CFU analysis animals  
807 were sacrificed and tissues were homogenized at day1, week 4 and week 7 post infection,  
808 plating was done on 7H11+OADC plates. For histopathological analysis, lung sections  
809 were fixed in 10 percent formalin and stained with hematoxylin and eosin. The tissue  
810 samples were coded and evaluated for granulomatous organization by a pathologist who  
811 has no prior knowledge of the samples. All granulomas in each section were scored and  
812 the scores were added up to obtain a total granuloma score of lungs of each animal. In  
813 addition, sections were semi-quantitatively assessed for percentage of the section  
814 occupied by granuloma and this was expressed as granuloma fraction.

### 815 **Cytokine profiling and RNA isolation from spleen**

816 Single cell suspension of splenocytes was made by passing the spleen through a cell  
817 strainer (0.45 $\mu$ ). The back of the syringe plunger was used to macerate the cells through  
818 the filter. The cell pellet was incubated with RBC lysis buffer for 4-5 mins after which  
819 the pellet was used for extracting RNA. RNA isolation was done from spleen of un-  
820 infected and guinea pigs infected with various strains Mtb at week 7 post infection using  
821 Rnaeasy Minikit according to manufacturer's protocol. cDNA synthesis and qRT-PCR  
822 were done as described previously using primers listed in Table S4.

### 823 **Lysine SDM generation**

824 The SDM mutant of *vapB12* wherein (lysine)<sub>K19</sub> to (Alanine)<sub>A19</sub> was mutated to was  
825 generated by Dpn1 enzyme treatment. The *vapBC12*His pMV261kan plasmid was used  
826 as a template for PCR amplification using SDM primers listed in Table S4. The PCR  
827 product was PCR purified and treated with Dpn1 enzyme for 4 hours at 37° C. No  
828 template and no Dpn1 treatment controls were also taken. All the reactions were  
829 transformed in *E.coli* XL-1 blue competent cells. The construct was sequenced and  
830 electroporated in *M. bovis* BCG competent cells.

### 831 **Immunoprecipitation**

832 The BCG:*vapBC12* His tagged pMV261 and BCG:*vapB<sub>K19A</sub>C12* His tagged cultures were  
833 maintained and grown in 7H9 enriched media, the log phase cultures of the strains were  
834 washed twice with PBST and resuspended in glycerol and cholesterol media at an OD of  
835 0.1. After 48 hours the cultures were pelleted and lysed in 1XPBS. The protein  
836 quantification of the lysates was done using Pierce BCA Protein Assay Kit - Thermo

837 Fisher Scientific according to manufacturer's protocol. 1mg of the lysate was incubated  
838 with 1:200 dilution of mouse anti-His antibody (Biospecs BTL1010) and incubated  
839 overnight at 4° C on a rocker. The Ag-Ab complex was incubated with protein G agarose  
840 beads and kept at 4° C on a rocker for 8-10 hours. After the incubation the supernatant  
841 was collected and beads were washed with 1X TBST thrice. The final elution was done  
842 with 100mM glycine pH2.0, which was neutralized later with tris pH 8.8. The eluted  
843 samples were run on the gel and blotted with rabbit anti-His (Santa Cruz, H-15:sc-803)  
844 and rabbit anti acetylated lysine antibody (Cell signaling, 9441L).

#### 845 **Sample processing protocol for mass spectrometry**

846 BCG strain (*vapB<sub>K:A</sub>C12*), overexpressing the toxin-antitoxin complex where antitoxin is  
847 His tagged with site-directed mutagenesis (SDM) converting lysine to alanine (K<sub>19</sub> to  
848 A<sub>19</sub>). Log phase culture of BCG strain (*vapB<sub>K:A</sub>C12*) was washed with PBS and  
849 inoculated in minimal media with 0.1 percent glycerol and minimal media with 0.01  
850 percent cholesterol. The cultures were allowed to grow for 48 hours and cell lysate was  
851 prepared. The Immunoprecipitation was performed using an anti-his antibody  
852 (BTL1010).

853 In-solution digestion was carried out for 10ug of proteins from each condition. The  
854 samples were subjected to reduction and alkylation using 5mM dithiothreitol (DTT) (60C  
855 for 45 min) and alkylation using 10 mM iodoacetamide (IAA). Trypsin (Gold mass-  
856 spectrometry trypsin; Promega, Madison, WI) digestion was carried out at 37C for 10-12  
857 h. The peptides were vacuum-dried and stored at - 80C until LC-MS/MS analysis.

#### 858 ***LC-MS/MS analysis***

859 All fractions were evaluated by 5600 Triple-TOF mass spectrometer which is directly  
860 linked to reverse-phase high-pressure liquid chromatography Ekspert-nanoLC 415 system  
861 (Eksigent; Dublin, CA). 0.1% formic acid in water was used as mobile phase A and  
862 mobile phase B is 0.1% formic acid in ACN. All fractions were eluted from the analytical  
863 column at a flow rate of 250 nL/min using an initial gradient elution of 10% B from 0 to  
864 5 min, transitioned to 40% over 120 min, ramping up to 90% B for 5 min, holding 90% B  
865 for 10 min, followed by re-equilibration of 5% B at 10 min with a total run time of 150  
866 min. Peptides were injected into the mass spectrometer using 10 µm SilicaTip  
867 electrospray PicoTip emitter. Mass spectra (MS) and tandem mass spectra (MS/MS) were

868 recorded in positive-ion and high-sensitivity mode with a resolution of ~35,000 full-  
869 width half-maximum. Before running samples to mass spectrometer, calibration of  
870 spectra occurred after acquisition of every sample using dynamic LC-MS and MS/MS  
871 acquisitions of 100 fmol  $\beta$ -galactosidase. The ion accumulation time was set to 250 ms  
872 (MS) and to 70 ms (MS/MS). The collected raw files spectra were stored in .wiff format.

### 873 **Mass spectrometry data analysis**

874 All raw mass spectrometry files were searched in Protein Pilot software v. 5.0.1 (SCIEX)  
875 with the Paragon algorithm. For Paragon searches, the following settings were used:  
876 Sample type: Identification; Cysteine Alkylation: Iodoacetamide, Digestion: Trypsin;  
877 Instrument: TripleTOF5600. Species: H37Rv maximum allowed missed cleavages 1,  
878 Search effort: Thorough ID; Results Quality: 0.05. Only peptides with a confidence score  
879 of > 0.05 were considered for further analysis and bias correction was automatically  
880 applied. False discovery rate analysis was also performed through decoy database.  
881 Carbamidomethylation (C) was used as a fixed modification. The peptide and product  
882 ion tolerance of 0.05 Da was used for searches. The output of this search is a .group file  
883 and this file contains the following information that is required for targeted data  
884 extraction: protein name and accession, cleaved peptide sequence, modified peptide  
885 sequence, relative intensity, precursor charge, unused Protscore, confidence, and decoy  
886 result.

### 887 **Mass spectrometry data submission**

888 The mass spectrometry data obtained from this study has been submitted to public data  
889 repositories. The raw proteomics data has been deposited to the ProteomeXchange  
890 Consortium via the PRIDE partner repository with the dataset identifier PXD014323. The  
891 data also submitted to Massive database at the following link-

892 <http://massive.ucsd.edu/ProteoSAFe/status.jsp?task=f56cfab246304977aa56f3e54aa9193>

### 893 **Codon usage**

894 The bioinformatic analysis was done for determining the codon usage of proT and proY  
895 in each gene belonging to all ten functional categories. All the data and the code used for  
896 the analysis is given the link below.

897 <https://github.com/ddlab-igib/mtb-codon-usage>

### 898 **ATP estimation**

899 Log phase culture *M. bovis* BCG wild type and *ΔBCGvapC12* strains were washed with  
900 PBST twice and inoculated in 0.1 per cent glycerol and 0.01 per cent cholesterol media at  
901 an absorbance of 0.005. The aliquots of the cultures were taken at day 5 for ATP  
902 estimation. 1ml of each of the culture was pelleted down and resuspended in 0.5ml of  
903 PBS followed by heat lysis of cultures at 98°C for ten minutes. ATP was estimated from  
904 bacterial lysates using Bac Titer-Glo™ Assay kit from Promega using manufacturer's  
905 protocol. The protein estimation was done in the lysate using Pierce BCA Protein Assay  
906 Kit - Thermo Fisher Scientific according to manufacturer's protocol.

### 907 **Statistical analysis**

908 Statistical analysis and graph generation was done using Prism 5 software (Version 5.01;  
909 GraphPad Software Inc., CA, USA). For normally distributed data, un-paired student t-  
910 test was performed on the means of at least three independent experiments. For animal  
911 experiment data analysis Mann Whitney test was performed. P values of less than 0.05,  
912 0.01 and 0.005 were represented to be significantly different as \*, \*\* and \*\*\*  
913 respectively.

914  
915  
916  
917  
918  
919  
920  
921  
922  
923  
924  
925  
926  
927  
928  
929  
930  
931  
932  
933  
934  
935  
936

937 **Figure Legends**

938

939 **Figure1: *vapC12* gene is essential for cholesterol-specific growth modulation in**  
940 ***Mycobacterium tuberculosis* (Mtb)**

941 A) The growth curve of H37Rv in a minimal media supplemented with 0.1% glycerol  
942 and 0.01% cholesterol. The log-phase cultures of H37Rv grown in 7H9 media enriched  
943 with OADC were washed with PBS-tyloxapol and resuspended in respective media at an  
944 absorbance of 0.005. Growth was estimated by CFU plating on 7H11+OADC plates at  
945 different time points post inoculation. Experiments were performed in triplicates, and  
946 data represent the mean  $\pm$  SEM.

947 B&E) Resazurin-based estimation of the metabolic activity of H37Rv (B) and  $\Delta vapC12$   
948 and  $\Delta vapC12:vapBC12$  (E) grown in a minimal media supplemented with glycerol and  
949 cholesterol. Strains were serially diluted in a 96-well plate in respective media. The  
950 experiment was performed in two independent sets, and the plate was incubated at 37°C  
951 for 5 days. One set of the experiment was used for recording fluorescence after adding  
952 the presto blue reagent at 570 or 585 nm, whereas the other set was used for enumeration  
953 of bacteria present in each well. The metabolic activity calculated for each well is  
954 representative of the mean fluorescent readout per bacteria from three independent  
955 experiments. Data were analysed using unpaired Student's t test. \*P < 0.05, \*\*P < 0.01

956 C&F) Kill curve of *M. bovis* BCG (C) and BCG $\Delta vapC12$  and BCG  $\Delta vapC12:vapBC12$   
957 (F) grown in glycerol- and cholesterol-rich media. Log-phase cultures of strains were  
958 washed with PBS-tyloxapol and inoculated at an absorbance of 0.05. The cultures were  
959 allowed to grow for 4 days before being treated with 5 $\times$  MIC of rifamycin. Bacterial  
960 enumeration was performed through CFU plating of cultures on 7H11+OADC plates at  
961 various time points. The kill curve was plotted by calculating the percent survival. The  
962 experiment was repeated three times, and data represented are the mean  $\pm$  SEM. Data  
963 were analysed using unpaired Student's t test. \*P < 0.05, \*\*P < 0.01

964 D) Percent wild-type growth of the *vapC12* mutant and  $\Delta vapC12:vapBC12$  in a minimal  
965 media containing 0.1% glycerol and 0.01% cholesterol. Growth was estimated by CFU  
966 plating of cultures on 7H11+OADC plates 8 days post inoculation. The experiment was  
967 repeated three times, and data represented are the mean  $\pm$  SEM. Data were analysed using



968 unpaired Student's t test. \*P < 0.05, \*\*P < 0.01

969 G) Heat-map visualization of differentially expressed transcripts in wild type H37Rv  
970 grown in Glycerol and Cholesterol media, analysed through RNA-sequencing.  
971 Expression data of the respective genes based on FDR adjusted are depicted in the heat  
972 map. The RNA for sequencing was isolated from four different set of cultures grown in  
973 respective media.

974 H) Percent estimation of ATP in wild-type BCG and  $\Delta BCGvapC12$  strains grown in a  
975 cholesterol-rich media relative to glycerol-rich media. ATP estimated in micromolar  
976 concentrations was normalized with per milligram of protein in each sample. The  
977 experiment was repeated three times, and data plotted represents the mean  $\pm$  SEM. Data  
978 were analysed using unpaired Student's t test. P value \*<0.05, \*\*<0.01.

979 **Figure 2: VapC12 ribonuclease toxin targeting proT is essential for cholesterol-**  
980 **mediated growth regulation in Mtb**

981 A) Diagrammatic representation of toxin–antitoxin *vapBC12* locus.

982 B) Relative expression of proT tRNA through qRT-PCR in the *vapC12* mutant relative to  
983 the wild-type H37Rv strain grown in media containing glycerol, cholesterol, and  
984 palmitate as the sole carbon source.

985 C) Growth curve of *M. bovis* BCG strain expressing *vapC12*, *vapB12*, and *vapBC12* in  
986 the pUV15-tetO expression system under the tet-inducible promoter in 7H9+OADC  
987 media. Anhydrotetracycline (ATc), an inducer of the tet operon, was used at a  
988 concentration of 100 ng/mL and replenished every fourth day.

989 D) Two-fold serial dilutions (N/2, N/4, N/8, N/16, N/32) of the log phase growing culture  
990 *BCG:pUV15 tetO:vapC12* strain grown in 7H9 broth were spotted on 7H11 agar plates  
991 with or without ATc.

992 E) Relative quantification of the transcript levels of proT gene in *BCG:pUV15-*  
993 *tetO:vapC12* grown in 7H9 media with or without ATc by qRT-PCR.

994 F) RNase activity of purified wild-type and mutant VapC12 toxins against in vitro  
995 transcribed tRNA substrates. Different wells of the gel denote different combination of  
996 tRNA transcript and purified proteins viz; (A) Wild-type VapC12 toxin protein incubated  
997 with proT, (B) proT tRNA only with no protein, (C) wild-type VapC12 toxin protein  
998 incubated with proU, (D) proU tRNA only, (E) mutant VapC12D<sub>94</sub>A toxin protein

999 incubated with proT, and (F) mutant VapC12D<sub>5</sub>A toxin protein incubated with proT.  
1000 Each reaction was incubated at 37°C for 3 hours. The products of each of the reaction  
1001 were run on a 3% agarose gel and visualized by adding ethidium bromide followed by  
1002 exposure to UV light.

1003 G) Relative density of marked RNA bands in Fig 2F quantified using ImageJ. The  
1004 experiment (2F) was repeated three times, and data plotted represent the mean ± SEM.

1005 H) Schematic representation of the protocol for the experiment to demonstrate  
1006 cholesterol-specific dissociation of the antitoxin.

1007 I) Western blot for cholesterol-specific dissociation and degradation of the antitoxin from  
1008 the toxin–antitoxin complex. The His-tagged antitoxin was tracked using an anti-His  
1009 antibody in the cell lysate of BCG overexpressing His-tagged antitoxin as a part of the  
1010 toxin–antitoxin complex. Cell lysates were prepared by sampling cultures grown in both  
1011 glycerol and cholesterol media at different time points and probed with an anti-His  
1012 antibody.

1013 J) Western blot of the protein lysates prepared from BCG overexpressing toxin-antitoxin  
1014 locus (VapBC12) with His tagged antitoxin VapB12 and BCG strain with N- terminal  
1015 His tagged VapBC12 where in lysine residue of AT is converted to alanine  
1016 (VapB<sub>K:A</sub>C12). Immunoprecipitation was performed using mouse anti-His antibody and  
1017 probed with rabbit anti-acetyl lysine and anti-His antibodies. To normalize for the  
1018 amount of the protein, three-fold higher concentration of protein was loaded in the  
1019 cholesterol-grown BCG sample.

1020 K) Mass spectrometry analysis of His-tagged antitoxin protein isolated from BCG  
1021 overexpressing VapBC12 complex grown in glycerol and cholesterol media. Tryptic  
1022 digest of immunoprecipitated samples from glycerol and cholesterol grown cultures were  
1023 analysed by LC-MS/MS (Sciex Triple TOF 5600). Representative MS/MS spectrum of  
1024 peptide from glycerol grown sample, ELLHELK(Ac)AR was acetylated and displays  
1025 mass shift corresponding acetylation (m/z 416.26) when compared to the unmodified  
1026 peptide from cholesterol grown sample.

1027 L) Growth curve of BCG overexpressing toxin–antitoxin (*vapBC12*) and lysine mutant  
1028 (*vapB<sub>K:A</sub>C12*) in a minimal media containing 0.1% glycerol as the carbon source.  
1029 Bacterial enumeration was performed at day 7 after inoculation by CFU plating on

1030 7H11+OADC plates. Experiment was performed in triplicates, and data plotted represent  
1031 the mean  $\pm$  SEM. Data were analysed using unpaired Student's t test. \*P < 0.05, \*\*P <  
1032 0.01

1033

1034 **Figure 3: Cholesterol-dependent activation of *vapC12* toxin generates and enriches**  
1035 **the persister population in the Mtb culture**

1036 A) Schematic representation of the persister enrichment experiment.

1037 B) & C) Growth curve of H37Rv and *vapC12* mutant strains grown in 7H9 enriched,  
1038 0.1% glycerol and 0.01% cholesterol media for first 4 days and then resuspended in a  
1039 cholesterol-rich media for subsequent days. Bacterial enumeration was performed by  
1040 plating cultures on 7H11+OADC plates at various time points. The experiment was  
1041 performed in triplicates, and data plotted represent the mean  $\pm$  SEM. Data were analysed  
1042 using unpaired Student's t test. \*P < 0.05

1043 D) Expression analysis of proT tRNA through qRTPCR in H37Rv and *vapC12* mutant  
1044 strains at day 8 relative to day 4 of the persister enrichment growth curve (Fig.3B and  
1045 3C).

1046 E) Schematic representation of growth curves obtained from spent media from wild-type  
1047 H37Rv and *vapC12* mutant strains grown in cholesterol.

1048 F) The *vapC12* mutant strain was grown in a media containing 0.01% cholesterol in  
1049 triplicate for the first 4 days and then resuspended in spent media from H37Rv, *vapC12*  
1050 mutant, and fresh cholesterol individually. Bacterial enumeration was performed by  
1051 plating cultures on 7H11+OADC plates. The experiment was repeated three times, and  
1052 data plotted represent the mean  $\pm$  SEM. Data were analysed using unpaired Student's t  
1053 test. \*P < 0.05 \*\*P < 0.01.

1054 G) Expression analysis of proT tRNA through qRTPCR in the *vapC12* mutant strain  
1055 grown in a cholesterol-spent media at day 10 of the growth curve relative to the culture  
1056 grown in a fresh cholesterol-rich media at day 4 (Fig. 3F).

1057 H) The BCG *vapC12* mutant strain was grown in a media containing 0.01% cholesterol  
1058 in triplicate for the first 4 days and then resuspended in spent media from wild-type BCG,  
1059 *vapC12* mutant, and wild-type BCG supplemented with purified VapB12 antitoxin  
1060 (12.2nm) and VapC12 toxin at two different concentration (6.9nM and 13.8nM).

1061 Bacterial enumeration was performed through CFU plating on 7H11+OADC plates. The  
1062 experiment was repeated three times, and data plotted represent the mean  $\pm$  SEM. Data  
1063 were analysed using unpaired Student's t test. \*P < 0.05 \*\*P < 0.01.

1064 I) Schematic representation of the experiment to demonstrate that toxin is secreted out in  
1065 the culture filtrate of BCG.

1066 J) Western blot showing the flag-tagged toxin in the culture filtrate of BCG strain  
1067 overexpressing the toxin-antitoxin complex (VapBC12). The culture filtrate was probed  
1068 with an anti-flag antibody to detect the toxin protein, anti-Ag85B antibody as a positive  
1069 control for the secretory protein, and an anti-GroEL1 antibody as a negative control to  
1070 ensure no lysis of bacterial cells occurred during sample preparation.

1071

1072 **Figure 4: *vapC12*-mediated downregulation of proT-encoded proline-rich proteins**  
1073 **are essential for persistence of Mtb in a guinea pig model of infection.**

1074 A) Relative band intensity representing the expression of His-tagged PE-PGRS and RpfA  
1075 proteins in BCG and *vapC12* mutant strains grown in glycerol- and cholesterol-rich  
1076 media. The numbers on each individual bar represent the percentage of ProT codon in  
1077 that particular protein. The protein lysates were prepared from overexpressed strains with  
1078 an OD of 0.8–1. The samples were run on SDS PAGE and probed with an anti-His  
1079 antibody.

1080 B) Bacterial load in the lungs of guinea pigs infected with H37Rv,  $\Delta$ *vapC12*, and  
1081  $\Delta$ *vapC12*:*vapBC12* strains of Mtb. At designated time points, the lungs were  
1082 homogenized in 4 mL of saline, and ten-fold serial dilutions of homogenates were plated  
1083 on 7H11+OADC plates. Each group constituted six guinea pigs per time point. Data  
1084 plotted represent the mean  $\pm$  SEM. Significant differences observed between groups are  
1085 indicated. Data were analysed using the Mann-Whitney U test with \*\*P < 0.01 and \*P <  
1086 0.05.

1087 C) Photomicrographs of H&E-stained (40 $\times$  and 100 $\times$ ) and high-resolution scanning  
1088 (2,400 dpi) of lung sections from guinea pigs infected with different strains of Mtb at 7  
1089 weeks post infection.

1090 D) Granuloma fraction of the lung tissue samples of guinea pigs infected with different  
1091 strains of Mtb, based on the semi-quantitative estimation of the fraction of the lung

1092 tissue covered with granuloma. Data were analysed using the Mann–Whitney U test  
1093 with \*P < 0.05 and \*\*P < 0.01.

1094 E) Total number of necrotic and non-necrotic granulomas in the lung tissue samples of  
1095 guinea pigs infected with different strains of Mtb. Data were analysed using the  
1096 Mann–Whitney U test with \*P < 0.05, \* P < 0.01, and \*\*\*P < 0.001.

1097 F) Cytokine profiling of animals infected with H37Rv, *ΔvapC12*, and *ΔvapC12:vapBC12*  
1098 strains of Mtb. RNA was extracted from the spleen of infected animals 7 weeks post  
1099 infection. The relative expression of cytokines in different groups of animals was  
1100 quantified through qRT-PCR. Data were normalized with the findings of the uninfected  
1101 group. Data plotted represent the mean ± SEM. Data were analysed using the Mann–  
1102 Whitney test with \*P < 0.05 and \*\*P < 0.01.

1103

#### 1104 **Supplementary legends**

1105 S1) TraCS data representing transposon mutants of *vapC* genes that were overrepresented  
1106 by more than 2-fold in a cholesterol-rich media compared with a glycerol-rich media, as  
1107 calculated by number of reads detected per TA insertion site(32).

1108 S2) Log-phase cultures of H37Rv and *ΔRv0665 (ΔvapC8)* grown in the 7H9 enriched  
1109 media were washed with PBS+tyloxapol and resuspended in a media containing 0.01%  
1110 cholesterol at an absorbance of 0.005. Percent survival of *ΔvapC8* relative to wild-type  
1111 H37Rv was estimated by plating the culture at day zero and day 8 post inoculation.

1112 S3) The kill curve of *M. bovis* BCG, BCG*ΔvapC12* and BCG*ΔvapC12:vapBC12* grown  
1113 in the glycerol-rich media. Log-phase cultures of strains were washed with PBS-  
1114 tyloxapol and inoculated at an absorbance of 0.05. The cultures were allowed to grow for  
1115 4 days before being treated with 5× MIC of rifamycin. Bacterial enumeration was  
1116 performed by plating cultures on 7H11+OADC plates at various time points. The kill  
1117 curve was plotted by plotting CFU. The experiment was repeated three times, and data  
1118 plotted represent the mean ± SEM. Data were analysed using unpaired Student's t test.

1119 S4) Volcano plot of differentially expressed genes in H37Rv grown in the cholesterol-  
1120 rich media relative to the glycerol-rich media. Transcriptome of Mtb exhibited 39  
1121 downregulated and 45 upregulated genes in the cholesterol-rich media relative to the  
1122 glycerol-rich media.

1123 S5) Relative expression of proT tRNA through qRT-PCR in wild-type H37Rv strain  
1124 grown in media containing glycerol and cholesterol as the sole carbon source.

1125 S6) Relative expression of 10 tRNAs through qRT-PCR in wild-type H37Rv and  
1126 *ΔvapC12* grown in the cholesterol-rich media.

1127 S7) The growth curve analysis of BCG grown in a minimal media supplemented with  
1128 0.1% glycerol and 50mg/ml palmitate. Log-phase cultures of wild type BCG grown in  
1129 7H9 media enriched with OADC was washed with PBS-tyloxapol and resuspended in  
1130 respective media at an absorbance of 0.005. Growth was estimated by CFU plating on  
1131 7H11+OADC plates at different time points post inoculation, and colonies were counted  
1132 after 3 weeks of incubation of plates at 37°C. Experiments were performed in triplicates,  
1133 and data represent the mean ± SEM.

1134 S8) Purified recombinant VapC12, VapC12 D<sub>5</sub>A, and VapC12 D<sub>94</sub>A proteins were  
1135 subjected to SDS PAGE and probed with an anti-His antibody.

1136 S9) Multiple sequence alignment of VapCs toxins indicating conserved aspartate residues  
1137 in the PIN domain of toxins.

1138 S10) Protein sequence coverage of peptides from BCG:VapBC12 His tagged  
1139 overexpression strain grown in glycerol and cholesterol media, where grey colour  
1140 indicates no match or 0 peptide confidence, red colour is >0 and <50 peptide confidence,  
1141 yellow colour is ≥50 and <95 peptide confidence and green colour is ≥95 peptide  
1142 confidence.

1143 S11) Genome-wide in silico analysis of the codon usage of proT and proY tRNA in each  
1144 gene belonging to all 10 functional groups in Mtb. Data for codon usage can be obtained  
1145 from the link provided in material and methods.

1146 S12) Codon usage of proT and proY tRNA in the PE-PGRS group of genes of Mtb

1147 S13) Relative expression of His-tagged PE-PGRS and RpfA proteins in BCG and *vapC12*  
1148 mutant strains grown in glycerol- and cholesterol-rich media. The protein lysates were  
1149 prepared from overexpressed strains with an OD of 0.8–1. The samples were run on SDS  
1150 PAGE and probed with an anti-His antibody.

1151 S14) Relative survival of wild-type H37Rv, *ΔvapC12*, and *ΔvapC12:vapBC12* strains in  
1152 mouse bone marrow-derived macrophages. Infection was performed at MOI of 1, and  
1153 CFU plating was performed at day 0 and day 7 for bacterial enumeration on



1154 7H11+OADC plates. The experiment was repeated three times, and data plotted represent  
1155 the mean  $\pm$  SEM. Data were analysed using unpaired Student's t test. \*P < 0.05 \*\*P <  
1156 0.01.

1157 S15) H37Rv and  $\Delta vapC12$  strains were subjected to different stress conditions:  
1158 nitrosative stress with 200  $\mu$ M of Deta-NO for 48 hours and oxidative stress with 5 mM  
1159 of H<sub>2</sub>O<sub>2</sub> treatment for 6 hours. Percent survival of  $\Delta vapC12$  relative to the wild-type  
1160 strain was calculated by plating cultures at day zero and respective time points.

1161 S16) Bacterial load in the spleen of guinea pigs infected with H37Rv,  $\Delta vapC12$ , and  
1162  $\Delta vapC12:vapBC12$  strains of Mtb. At designated time points, spleens were homogenized  
1163 in 4mL of saline, and ten-fold serial dilutions of homogenates were plated on  
1164 7H11+OADC plates. Each group constituted six guinea pigs per time point. Data plotted  
1165 represent the mean  $\pm$  SEM. Significant differences observed between groups are  
1166 indicated. Data were analysed using the Mann-Whitney U test with \*\*P < 0.01 and \*P <  
1167 0.05).

1168 S17) Gross pathology of the lungs and spleen of guinea pigs infected with various strains  
1169 of Mtb at 7 weeks post infection.

1170 S18) Graphical abstract of the study indicating degradation of AT VapB12 and  
1171 subsequent activation of toxin VapC12 under cholesterol rich condition. The fast-  
1172 growing bacteria with higher expression of toxin are eliminated or killed as compared to  
1173 the slow growing bacteria in the population with less expression of the toxin VapC12.

1174

1175

1176

1177

1178

1179

1180

1181

1182

1183

1184

1185 **Table S1: DEGs of H37Rv Cholesterol versus Glycerol**

| Gene ID          | UP/DOWN | log2 fold change | Functional Category                     |
|------------------|---------|------------------|-----------------------------------------|
| Rv1623c (cydA)   | DOWN    | -4.173367035     | Intermediary metabolism and respiration |
| Rv1130 (prpD)    | UP      | 4.498655002      | Intermediary metabolism and respiration |
| Rv2990c          | DOWN    | -2.46505342      | Hypothetical protein                    |
| Rv1621c (cydD)   | DOWN    | -6.129680086     | Intermediary metabolism and respiration |
| Rv0280 (PPE3)    | DOWN    | -2.682612285     | Pe/ppe                                  |
| Rv0288 (esxH)    | DOWN    | -2.201997608     | Cell wall and cell processes            |
| Rv2200c (ctaC)   | DOWN    | -1.889979288     | Intermediary metabolism and respiration |
| Rv2628           | UP      | 2.021486436      | Conserved hypotheticals                 |
| Rv0282 (eccA3)   | DOWN    | -1.688985396     | Cell wall and cell processes            |
| Rv1813c          | UP      | 2.282592255      | Conserved hypotheticals                 |
| Rv0284 (eccC3)   | DOWN    | -1.383205517     | Cell wall and cell processes            |
| Rv0106           | DOWN    | -3.877437264     | Conserved hypotheticals                 |
| Rv0693 (pqqE)    | DOWN    | -1.319452755     | Intermediary metabolism and respiration |
| Rv3132c (devS)   | UP      | 1.483961765      | Regulatory proteins                     |
| Rv2590 (fadD9)   | UP      | 1.288687433      | Lipid metabolism                        |
| Rv1997 (ctpF)    | UP      | 1.802391097      | Cell wall and cell processes            |
| Rv1307 (atpH)    | DOWN    | -1.389318935     | Intermediary metabolism and respiration |
| Rv1306 (atpF)    | DOWN    | -2.691093389     | Intermediary metabolism and respiration |
| Rv3127           | UP      | 1.039567778      | Conserved hypotheticals                 |
| rrf              | DOWN    | -1.325508211     | Stable mas                              |
| Rv1310 (atpD)    | DOWN    | -1.397824532     | Intermediary metabolism and respiration |
| Rv1548c (PPE21)  | UP      | 2.939297215      | Pe/ppe                                  |
| Rv1394c (cyp132) | UP      | 1.930458768      | Intermediary metabolism and respiration |
| Rv1739c          | UP      | 0.903915373      | Cell wall and cell processes            |
| Rv2196 (qcrB)    | DOWN    | -1.390614561     | Intermediary metabolism and respiration |
| Rv1131 (prpC)    | UP      | 3.678185003      | Intermediary metabolism and respiration |
| Rv3544c (fadE28) | UP      | 4.273345021      | Lipid metabolism                        |
| Rv3550 (echA20)  | UP      | 6.005298267      | Lipid metabolism                        |
| Rv2059           | DOWN    | -1.978695163     | Conserved hypotheticals                 |
| Rv1622c (cydB)   | DOWN    | -3.539384506     | Intermediary metabolism and respiration |
| Rv1303           | DOWN    | -2.450539716     | Cell wall and cell processes            |
| Rv3131           | UP      | 0.863421873      | Conserved hypotheticals                 |
| Rv3556c (fadA6)  | UP      | 1.938757989      | Lipid metabolism                        |
| Rv0287 (esxG)    | DOWN    | -2.213333967     | Cell wall and cell processes            |
| Rv0283 (eccB3)   | DOWN    | -1.489782204     | Cell wall and cell processes            |
| Rv1620c (cydC)   | DOWN    | -3.302613118     | Intermediary metabolism and respiration |
| Rv1886c (fbpB)   | DOWN    | -1.923219182     | Lipid metabolism                        |
| Rv0281           | DOWN    | -2.01561594      | Lipid metabolism                        |
| Rv3545c (cyp125) | UP      | 2.103879342      | Intermediary metabolism and respiration |
| Rv1203c          | DOWN    | -7.198592765     | Conserved hypotheticals                 |
| Rv2989           | DOWN    | -3.20461473      | Regulatory proteins                     |

|                  |      |              |                                         |
|------------------|------|--------------|-----------------------------------------|
| Rv0991c          | DOWN | -7.786451806 | Conserved hypotheticals                 |
| Rv1928c          | UP   | 4.669685894  | Intermediary metabolism and respiration |
| Rv0878c (PPE13)  | UP   | 2.415321478  | Pe/ppe                                  |
| Rv2629           | UP   | 0.960349298  | Conserved hypotheticals                 |
| Rv1205           | DOWN | -7.651398542 | Conserved hypotheticals                 |
| Rv2219A          | UP   | 3.175822134  | Cell wall and cell processes            |
| Rv2195 (qcrA)    | DOWN | -1.336408897 | Intermediary metabolism and respiration |
| Rv0286 (PPE4)    | DOWN | -1.456545343 | Pe/ppe                                  |
| Rv1279           | UP   | 2.363244433  | Intermediary metabolism and respiration |
| Rv2297           | UP   | 6.906052701  | Conserved hypotheticals                 |
| Rv2627c          | UP   | 1.449808908  | Conserved hypotheticals                 |
| Rv3552           | UP   | 2.886324732  | Intermediary metabolism and respiration |
| Rv1154c          | DOWN | -6.416507102 | Conserved hypotheticals                 |
| Rv1627c          | UP   | 1.559464153  | Lipid metabolism                        |
| Rv1129c          | UP   | 3.923881355  | Regulatory proteins                     |
| Rv0289 (espG3)   | DOWN | -1.541863924 | Cell wall and cell processes            |
| Rv3078 (hab)     | UP   | 7.058740267  | Intermediary metabolism and respiration |
| Rv1505c          | UP   | 8.135570656  | Conserved hypotheticals                 |
| Rv0722 (rpmD)    | UP   | 5.031834752  | Information pathways                    |
| Rv0129c (fbpC)   | UP   | 1.398249199  | Lipid metabolism                        |
| Rv1909c (furA)   | DOWN | -3.361374217 | Regulatory proteins                     |
| Rv1183 (mmpL10)  | UP   | 1.272401462  | Cell wall and cell processes            |
| Rv0339c          | UP   | 4.26743004   | Regulatory proteins                     |
| Rv0334 (rmlA)    | UP   | 3.877274953  | Intermediary metabolism and respiration |
| Rv3226c          | UP   | 5.924572815  | Conserved hypotheticals                 |
| Rv3554 (fdxB)    | UP   | 2.655054967  | Intermediary metabolism and respiration |
| Rv1412 (ribC)    | DOWN | -5.752670889 | Intermediary metabolism and respiration |
| Rv0885           | UP   | 2.688429483  | Conserved hypotheticals                 |
| Rv2633c          | DOWN | -1.371662275 | Conserved hypotheticals                 |
| Rv3739c (PPE67)  | UP   | 3.972189009  | Pe/ppe                                  |
| Rv1052           | DOWN | -6.079683034 | Conserved hypotheticals                 |
| Rv2679 (echA15)  | UP   | 6.474913551  | Lipid metabolism                        |
| Rv1996           | UP   | 0.766746134  | Virulence, detoxification, adaptation   |
| Rv2032 (acg)     | UP   | 1.102006514  | Conserved hypotheticals                 |
| Rv1846c (blaI)   | DOWN | -1.679048609 | Regulatory proteins                     |
| Rv3540c (ltp2)   | UP   | 4.699170107  | Lipid metabolism                        |
| Rv2944           | UP   | 7.224902316  | Insertion seqs and phages               |
| Rv2280           | DOWN | -1.619272741 | Intermediary metabolism and respiration |
| Rv1499           | UP   | 6.653957073  | Conserved hypotheticals                 |
| Rv2857c          | UP   | 4.523021237  | Intermediary metabolism and respiration |
| Rv2549c (vapC20) | DOWN | -6.254071649 | Virulence, detoxification, adaptation   |
| Rv1309 (atpG)    | DOWN | -1.054498325 | Intermediary metabolism and respiration |
| Rv0847 (lpqS)    | UP   | 4.7025265    | Cell wall and cell processes            |

1187 **Table S2: DEGs of H37Rv Cholesterol versus *AvapC12* Cholesterol**  
 1188

| Gene ID | log2FoldChange | UP/DOWN | Functional Category                      |
|---------|----------------|---------|------------------------------------------|
| Rv1721c | -3.809774762   | DOWN    | Virulence, detoxification and adaptation |
| Rv2378c | -7.834381397   | DOWN    | Lipid metabolism                         |
| Rv1441c | -7.414059049   | DOWN    | PE-PPE                                   |
| Rv1740  | -6.647609595   | DOWN    | Virulence, detoxification and adaptation |
| Rv2859c | -5.030327611   | DOWN    | Intermediary metabolism and respiration  |

1189

1190 **Table S3: Functional categorization of genes with proT codon usage above 60 per**  
 1191 **cent**

1192

| Gene Id | Functional category                   | % proT      |
|---------|---------------------------------------|-------------|
| Rv0596c | virulence, detoxification, adaptation | 60          |
| Rv1952  | virulence, detoxification, adaptation | 60          |
| Rv2865  | virulence, detoxification, adaptation | 60          |
| Rv2549c | virulence, detoxification, adaptation | 66.66666667 |
| Rv1956  | virulence, detoxification, adaptation | 71.42857143 |
| Rv1982A | virulence, detoxification, adaptation | 75          |
| Rv2863  | virulence, detoxification, adaptation | 80          |
| Rv0300  | virulence, detoxification, adaptation | 100         |
| Rv0550c | virulence, detoxification, adaptation | 100         |
| Rv1103c | virulence, detoxification, adaptation | 100         |
| Rv2760c | virulence, detoxification, adaptation | 100         |
| Rv0737  | regulatory proteins                   | 60          |
| Rv3557c | regulatory proteins                   | 60          |
| Rv3050c | regulatory proteins                   | 62.5        |
| Rv1994c | regulatory proteins                   | 66.66666667 |
| Rv0348  | regulatory proteins                   | 71.42857143 |
| Rv2021c | regulatory proteins                   | 100         |
| Rv3653  | PE/PPE                                | 60          |
| Rv0872c | PE/PPE                                | 61.11111111 |
| Rv2853  | PE/PPE                                | 61.11111111 |
| Rv0354c | PE/PPE                                | 62.5        |
| Rv2162c | PE/PPE                                | 62.5        |
| Rv1068c | PE/PPE                                | 63.63636364 |
| Rv3512  | PE/PPE                                | 64.28571429 |
| Rv0833  | PE/PPE                                | 64.70588235 |
| Rv1441c | PE/PPE                                | 64.70588235 |
| Rv3367  | PE/PPE                                | 64.70588235 |
| Rv1452c | PE/PPE                                | 65.2173913  |
| Rv1169c | PE/PPE                                | 66.66666667 |

|         |                                         |             |
|---------|-----------------------------------------|-------------|
| Rv1840c | PE/PPE                                  | 66.66666667 |
| Rv0578c | PE/PPE                                  | 68.29268293 |
| Rv0747  | PE/PPE                                  | 68.42105263 |
| Rv1468c | PE/PPE                                  | 80          |
| Rv3508  | PE/PPE                                  | 85.18518519 |
| Rv3514  | PE/PPE                                  | 90.32258065 |
| Rv0470c | lipid metabolism                        | 60          |
| Rv0972c | lipid metabolism                        | 60          |
| Rv2724c | lipid metabolism                        | 60          |
| Rv2982c | lipid metabolism                        | 60          |
| Rv3221c | lipid metabolism                        | 100         |
| Rv0771  | intermediary metabolism and respiration | 60          |
| Rv1851  | intermediary metabolism and respiration | 60          |
| Rv1826  | intermediary metabolism and respiration | 60          |
| Rv2499c | intermediary metabolism and respiration | 60          |
| Rv2511  | intermediary metabolism and respiration | 60          |
| Rv2250A | intermediary metabolism and respiration | 63.63636364 |
| Rv1692  | intermediary metabolism and respiration | 64.70588235 |
| Rv1311  | intermediary metabolism and respiration | 66.66666667 |
| Rv1555  | intermediary metabolism and respiration | 66.66666667 |
| Rv1990A | intermediary metabolism and respiration | 66.66666667 |
| Rv2539c | intermediary metabolism and respiration | 66.66666667 |
| Rv3145  | intermediary metabolism and respiration | 66.66666667 |
| Rv2421c | intermediary metabolism and respiration | 70          |
| Rv3624c | intermediary metabolism and respiration | 70          |
| Rv2754c | intermediary metabolism and respiration | 71.42857143 |
| Rv0558  | intermediary metabolism and respiration | 72.72727273 |
| Rv0814c | intermediary metabolism and respiration | 75          |
| Rv1305  | intermediary metabolism and respiration | 75          |
| Rv3118  | intermediary metabolism and respiration | 75          |
| Rv3154  | intermediary metabolism and respiration | 77.77777778 |
| Rv2537c | intermediary metabolism and respiration | 80          |
| Rv0137c | intermediary metabolism and respiration | 81.81818182 |
| Rv0763c | intermediary metabolism and respiration | 83.33333333 |
| Rv0741  | insertion seqs and phages               | 60          |
| Rv1586c | insertion seqs and phages               | 60          |
| Rv2014  | insertion seqs and phages               | 71.42857143 |
| Rv3638  | insertion seqs and phages               | 71.42857143 |
| Rv1702c | insertion seqs and phages               | 74.19354839 |
| Rv1584c | insertion seqs and phages               | 75          |
| Rv0094c | insertion seqs and phages               | 77.27272727 |
| Rv3467  | insertion seqs and phages               | 77.27272727 |
| Rv1765A | insertion seqs and phages               | 100         |
| Rv1316c | information pathways                    | 60          |

|         |                              |             |
|---------|------------------------------|-------------|
| Rv2069  | information pathways         | 60          |
| Rv2906c | information pathways         | 60          |
| Rv2058c | information pathways         | 66.66666667 |
| Rv2056c | information pathways         | 66.66666667 |
| Rv1643  | information pathways         | 66.66666667 |
| Rv0722  | information pathways         | 100         |
| Rv2441c | information pathways         | 100         |
| Rv3053c | information pathways         | 100         |
| Rv3462c | information pathways         | 100         |
| Rv1772  | conserved hypotheticals      | 60          |
| Rv0678  | conserved hypotheticals      | 60          |
| Rv0607  | conserved hypotheticals      | 60          |
| Rv3678A | conserved hypotheticals      | 60          |
| Rv1590  | conserved hypotheticals      | 60          |
| Rv2283  | conserved hypotheticals      | 60          |
| Rv2426c | conserved hypotheticals      | 60          |
| Rv2438A | conserved hypotheticals      | 60          |
| Rv2558  | conserved hypotheticals      | 60          |
| Rv3224B | conserved hypotheticals      | 60          |
| Rv0323c | conserved hypotheticals      | 63.63636364 |
| Rv2257c | conserved hypotheticals      | 64.70588235 |
| Rv0078B | conserved hypotheticals      | 66.66666667 |
| Rv0181c | conserved hypotheticals      | 66.66666667 |
| Rv0530A | conserved hypotheticals      | 66.66666667 |
| Rv1120c | conserved hypotheticals      | 66.66666667 |
| Rv2820c | conserved hypotheticals      | 66.66666667 |
| Rv2239c | conserved hypotheticals      | 66.66666667 |
| Rv2342  | conserved hypotheticals      | 66.66666667 |
| Rv2923c | conserved hypotheticals      | 66.66666667 |
| Rv3472  | conserved hypotheticals      | 66.66666667 |
| Rv3033  | conserved hypotheticals      | 71.42857143 |
| Rv0028  | conserved hypotheticals      | 75          |
| Rv1890c | conserved hypotheticals      | 75          |
| Rv2603c | conserved hypotheticals      | 75          |
| Rv1066  | conserved hypotheticals      | 80          |
| Rv2049c | conserved hypotheticals      | 100         |
| Rv0378  | conserved hypotheticals      | 100         |
| Rv1893  | conserved hypotheticals      | 100         |
| Rv1993c | conserved hypotheticals      | 100         |
| Rv2548A | conserved hypotheticals      | 100         |
| Rv2738c | conserved hypotheticals      | 100         |
| Rv3440c | conserved hypotheticals      | 100         |
| Rv0011c | cell wall and cell processes | 60          |
| Rv0431  | cell wall and cell processes | 60          |



|         |                              |             |
|---------|------------------------------|-------------|
| Rv1463  | cell wall and cell processes | 60          |
| Rv1973  | cell wall and cell processes | 60          |
| Rv2856  | cell wall and cell processes | 60          |
| Rv2936  | cell wall and cell processes | 61.53846154 |
| Rv3864  | cell wall and cell processes | 61.9047619  |
| Rv3312A | cell wall and cell processes | 62.5        |
| Rv0583c | cell wall and cell processes | 65          |
| Rv2732c | cell wall and cell processes | 66.6666667  |
| Rv3277  | cell wall and cell processes | 66.6666667  |
| Rv0476  | cell wall and cell processes | 75          |
| Rv1881c | cell wall and cell processes | 75          |
| Rv2301  | cell wall and cell processes | 75          |
| Rv3271c | cell wall and cell processes | 75          |
| Rv0900  | cell wall and cell processes | 100         |
| Rv0039c | cell wall and cell processes | 100         |
| Rv0288  | cell wall and cell processes | 100         |
| Rv2520c | cell wall and cell processes | 100         |
| Rv3789  | cell wall and cell processes | 100         |
| Rv3857c | cell wall and cell processes | 100         |

1193

1194 **Table S4: Primers used in the study**

1195

| Name          | Sequence                                                                                          |
|---------------|---------------------------------------------------------------------------------------------------|
| Rv1720-F1     | ATGATATCTGGACTTGTCGATCCTGGAC                                                                      |
| Rv1720-R1     | ATGCGGCCGCAATGCGGAGATCGAGCTTGTC                                                                   |
| Rv1720-F2     | ATGGGCCCCGAGGCGTCCAACACGAT                                                                        |
| Rv1720-R2     | ATGGGCCCCGCAATCCGCGCACAAGAAG                                                                      |
| 1720-conf1    | GGAGATGCACCCGTTCTTGAC                                                                             |
| 1720-conf2    | ATGACCTTGATTCCGGCTGCC                                                                             |
| 1720-21-F     | GCTTTCGAATTAATTAATGTCGCCATGGTTCAGATCC                                                             |
| 1720-21-R     | CAGATTTAAATTCAGGCGACAAGCTCGATCTC                                                                  |
| 1721-F-P      | CTCGTTAATTAATGTCGCCATGGTTCAGATCC                                                                  |
| 1721-R-S      | CAGATTTAAATTCAGTTCAGATCGAGCTCGTC                                                                  |
| T7proU        | TCGGGGTGACAGGATTTGAACCTGCGGCCCTCCGCTCCCAAAGCGGATGCGCTACCAAG<br>CTGCGCTACACCCCGCCTATAGTGAGTCGTATTA |
| T7proT        | TCGGGCTGACAGGATTTGAACCTGCGACCACTTGACCCCAAGTCAAGTGCCTACCAAA<br>CTGCGCCACAGCCCGCCTATAGTGAGTCGTATTA  |
| T7 top strand | TAATACGACTCACTATA GG                                                                              |
| T7proT cg-2   | TCGGGCTGACAGGATTTGAACCTGCGACCACTTGAGCCCCAGTCAAGTGCCTACCAAA<br>CTGCGCCACAGCCCGCCTATAGTGAGTCGTATTA  |
| T7proT cg-3   | TCGGGCTGACAGGATTTGAACCTGCGACCACTTGACGCCAGTCAAGTGCCTACCAAA<br>CTGCGCCACAGCCCGCCTATAGTGAGTCGTATTA   |
| T7proT cg-5   | TCGGGCTGACAGGATTTGAACCTGCGACCACTTGACCCCACTCAAGTGCCTACCAAA<br>CTGCGCCACAGCCCGCCTATAGTGAGTCGTATTA   |
| T7proT at-4   | TCGGGCTGACAGGATTTGAACCTGCGACCACTTGACCCCTGTCAGTGCCTACCAAA<br>CTGCGCCACAGCCCGCCTATAGTGAGTCGTATTA    |
| T7proT pU-6   | TCGGGCTGACAGGATTTGAACCTGCGACCACTTGACCCCAAGTCAAGTGCCTACCAAA<br>CTGCGCCACAGCCCGCCTATAGTGAGTCGTATTA  |

RpfA F AATTCGAAATGCATCATCACCACCACCATATGAGTGGACGCCACCGTAAG  
RpfA R AAGTTAACTCAGCCGATGACGTACGGCT  
Rv1468 F AATTCGAAATGCATCATCACCACCACCATATGTCGTTTCGTGGTCGCGAATAC  
Rv1468 R AAGTTAACCTATGTTCCGTTTCGCGCCG  
Rv2340 F AATTCGAAATGCATCATCACCACCACCATATGTCGCACGTTACCGCGG  
Rv2340 R AAGTTAACTCATTTCGTGCCCGGGCG  
Rv3097 F AATTCGAAATGCATCATCACCACCACCATATGGTGTCTTATGTTGTTGCGTTGC  
Rv3097 R AAGTTAACTCAGGCGGCGATACCGAGTT  
Rv1068 F AATTCGAAATGCATCATCACCACCACCATATGTCCTACATGATTGCGGTGCC  
Rv1068 R AAGTTAACTTATGCCCCGGGCGTGCC  
Rv1441 F AATTCGAAATGCATCATCACCACCACCATATGTCGAACGTGATGGTAGTCCC  
Rv1441 R AAGTTAACTCACCCGTGCTTTCCTTGCG  
1720-21His F GCCTTCGAAATGCATCATCACCACCACCATATGTCCGCCATGGTTCAGATCCGCAACGT  
TCCCG  
1720-21 R CAGATTTAAATTCAGGCGACAAGCTCGATCTC  
1720-21 F GCCTTCGAAATGTCCGCCATGGTTCAGATCCGCAACGTTCCCG  
1720-21 Flag R ATTGTTAACTTACTGTCGTCGTCCTGTAGTCGATGTCGTGGTTCCTGTAGTCACCG  
TCGTGGTTCCTGTAGTCGGCGACAAGCTCGATCTCCGCATTATGGCCATGGG  
b-Actin:S RT S: CCA ACT GGG ACG ACA TGG AG  
b-Actin:A RT A: CGTAGCCCTCGTAGATGGGC  
GAPDH-F RT ACCACAGTCCATGCCATCAC  
GAPDH-R RT TCCACCACCCTGTTGCTGTA  
IFN $\gamma$ -F RT GACCTGAGCAAGACCCTGAG  
IFN $\gamma$ -R RT GCCATTTCCCTGACATATT  
TNFa-F RT ATCTACCTGGGAGGCGTCTT  
TNFa-R RT GAGTGGCACAAGGAAGTGGT  
IL-1b-F RT GGGCCTCAAGGGGAATC  
IL-1b-R RT GAGCACCCCTTAGCGTGCTCT  
IL-10-F RT GGCACGAACACCCAGTCTGA  
IL-10-R RT TCACCTGCTCCACTGCCTTG  
IL-12p40-F RT TCTGAGCCGGTCACAACCTGC  
IL-12p40-R RT AGGGCGCTGTCCTCCTGACAC  
Inos-F RT GCACACGTGGCTTCCCTCT  
Inos-R RT TGGGCCAGTGCTTCTGATTTTCC  
GM-CSF-F RT CTGTGGTTTGCAGCATCTGT  
GM-CSF-R RT GGGGCTCAAACCTGGTCATAG  
IL-2-F RT CTCAAGCTCTCCAAAGCA  
IL-2-R RT CCATCTCTCAGAAATCCAC  
TGF- $\beta$ -F RT CGGGGCTGGACACCAACTATTGC  
TGF- $\beta$ -R RT CTGCTCCACCTTGGCTTTGCGGCCAC  
proU RT F CGGGGTGTAGCGCAGCTT  
proU RT R TCGGGGTGACAGGATTTGAACCT  
proT RT F CGGGCTGTGGCGCAGT  
proT RT R TCGGGGTGACAGGATTTGAACC  
proY RT F CGGGGTGTGGCGCAG

proY RT R TCGGGGTGGCGGGATTG  
 SigH RT F TACTGACCAACACCTACATCA  
 SigH RT R CGGCAACGCTTCTAACGCTTC  
 arg T RT F GCCCTCGTAGCTCAGGG  
 arg T RT R TGCCCCCGGCAGGATTC  
 argV RT F GCCCCCGTAGCTCAGG  
 argV RT R TGCCCCCGGCAGGATTC  
 argU RT F GCGCCCGTAGCTCAACG  
 argU RT R CGCGCCCGAAGAGATTTCGAA  
 glyU RT F GCCGATGTAGTTCAATGGCAGAAC  
 glyU RT R AGCCGATGACGGGAATCGAAC  
 glyV RT F GCGGGCGTAGCTCAATGGT  
 glyV RT R AGCGGGCGACGGGAATC  
 glyT RT F GCGGATGTAGCGCAGTTGGT  
 glyT RT R AGCGGATGACGGGATTCGAAC  
 alaV RT F GGGGCTATGGCGCAGTTG  
 alaV RT R TGGAGCTAAGGGGATTCGAACC  
 alaU RT F GGGGCTATGGCGCAGCT  
 ala U RT R TGGAGCTAAGGGGACTCGAAC  
 1721-K-A-F GCTGGCGGCCCGC  
 1721-K-A-R GGGCCGCCAGCTCGT  
 Rv1720 d5 F GTGATCGTGTGGCCGCC  
 Rv1720 d5 R CGCCGAGGCGGCCA  
 Rv1720 d94 F GCCGCTGGAGCCTACG  
 Rv1720 d94 R GACGTAGGCTCCAGCGG

1196

1197 **Table S5: Strains used in this study**

1198

| Strain/Vector           | Host        | Marker               | Tag | Source                                |
|-------------------------|-------------|----------------------|-----|---------------------------------------|
| H37Rv                   |             |                      |     | Kind gift from Christopher M Sassetti |
| BCG                     |             |                      |     | ATCC                                  |
| E. coli XL-1 blue       |             | Tetracycline         |     | Stratagene                            |
| pET28a                  |             | kanamycin            |     | Novagen                               |
| pUV15tetO               |             | Hygromycin           |     | Kind gift from Sabine Ehrh            |
| pMV261                  |             | kanamycin            |     | Kind gift from Christopher M Sassetti |
| E.coli Rosetta          |             |                      |     | Novagen                               |
| Rv1720pET28a            | Rosetta DE3 | Kanamycin            |     |                                       |
| Rv1720 D5:A pET28a      | Rosetta DE3 | Kanamycin            |     |                                       |
| Rv1720 D94:A pET28a     | Rosetta DE3 | Kanamycin            |     |                                       |
| ΔRv1720c                | H37Rv       | Hygromycin           |     |                                       |
| ΔRv1720c:1720-21pJEB402 | H37Rv       | Hygromycin-Kanamycin |     |                                       |
| BCGΔ1720c               | BCG         | Kanamycin            |     |                                       |

|                             |       |                      |         |
|-----------------------------|-------|----------------------|---------|
| BCG: 1468c pMV261           | BCG   | Kanamycin            | His     |
| BCG: 1068c pMV261           | BCG   | Kanamycin            | His     |
| BCG: 1441c pMV261           | BCG   | Kanamycin            | His     |
| BCG: 2340c pMV261           | BCG   | Kanamycin            | His     |
| BCG: 3097c pMV261           | BCG   | Kanamycin            | His     |
| BCGΔ1720c:1468c pMV261      | BCG   | Hygromycin-Kanamycin | His     |
| BCGΔ1720c:1068c pMV261      | BCG   | Hygromycin-Kanamycin | His     |
| BCGΔ1720c:1441c pMV261      | BCG   | Hygromycin-Kanamycin | His     |
| BCGΔ1720c:2340c pMV261      | BCG   | Hygromycin-Kanamycin | His     |
| BCGΔ1720c:3097c pMV261      | BCG   | Hygromycin-Kanamycin | His     |
| BCG:Rv1721His-1720 pMV261   | BCG   | Hygromycin-Kanamycin | His     |
| BCG:Rv1721-1720 flag pMV261 | BCG   | Hygromycin-Kanamycin | 3X Flag |
| ΔRv0665                     | H37Rv | Hygromycin           |         |
| BCG:1720 pUV15 tetO         | BCG   | Hygromycin           |         |
| BCG:1721 pUV15 tetO         | BCG   | Hygromycin           |         |
| BCG:1720-21 pUV15 tetO      | BCG   | Hygromycin           |         |
| BCG:1721His K:A-1720        | BCG   | Kanamycin            | His     |
| BCGΔ1720:1721 His K:A-1720  | BCG   | Kanamycin            | His     |

---

Figure 1

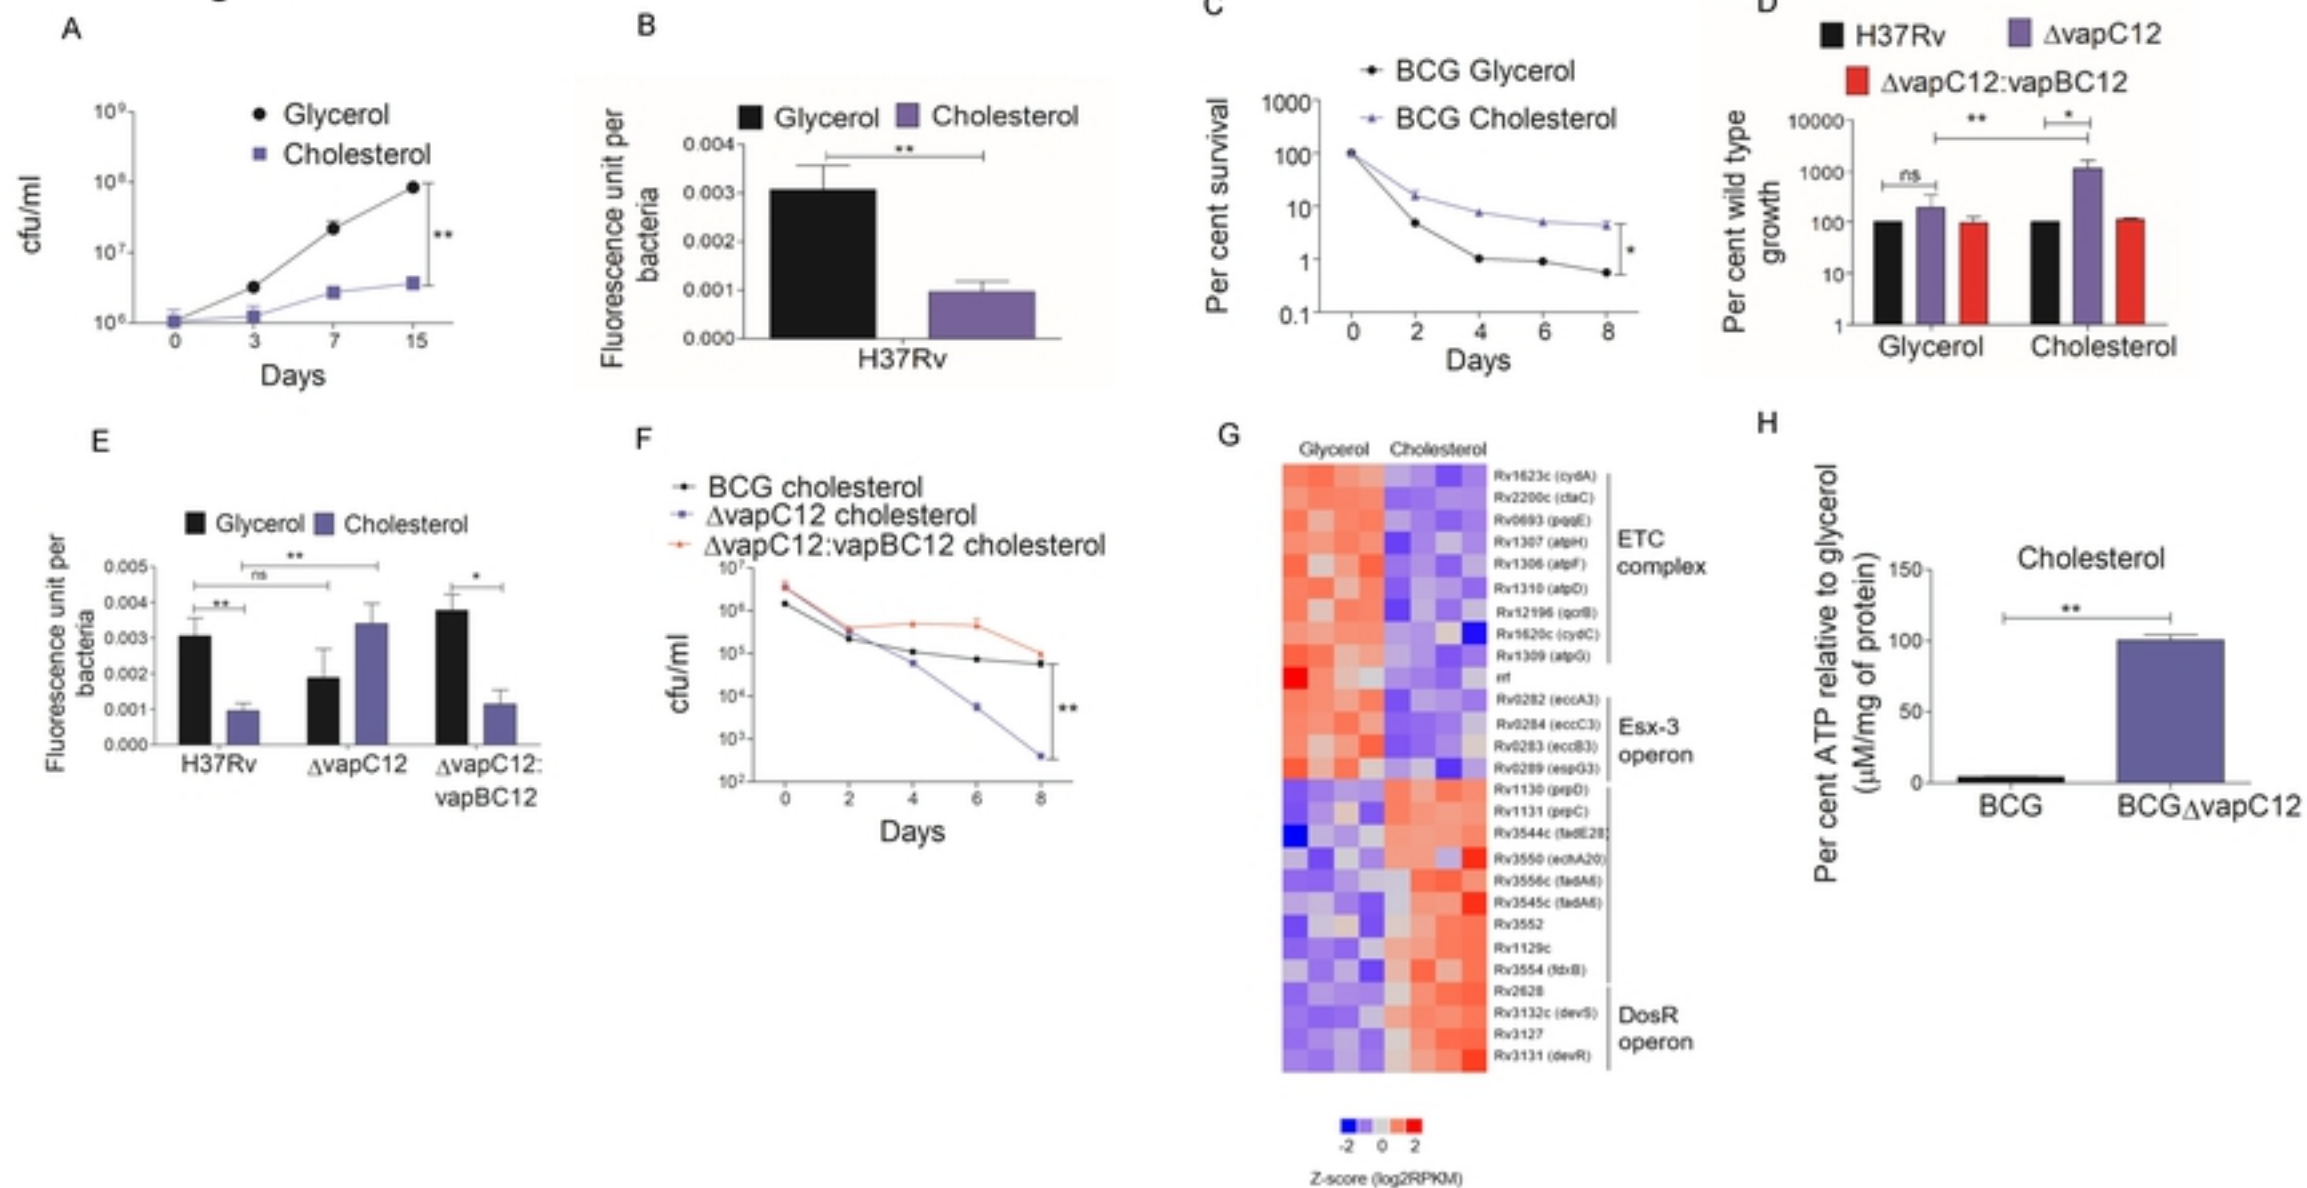

Figure 2

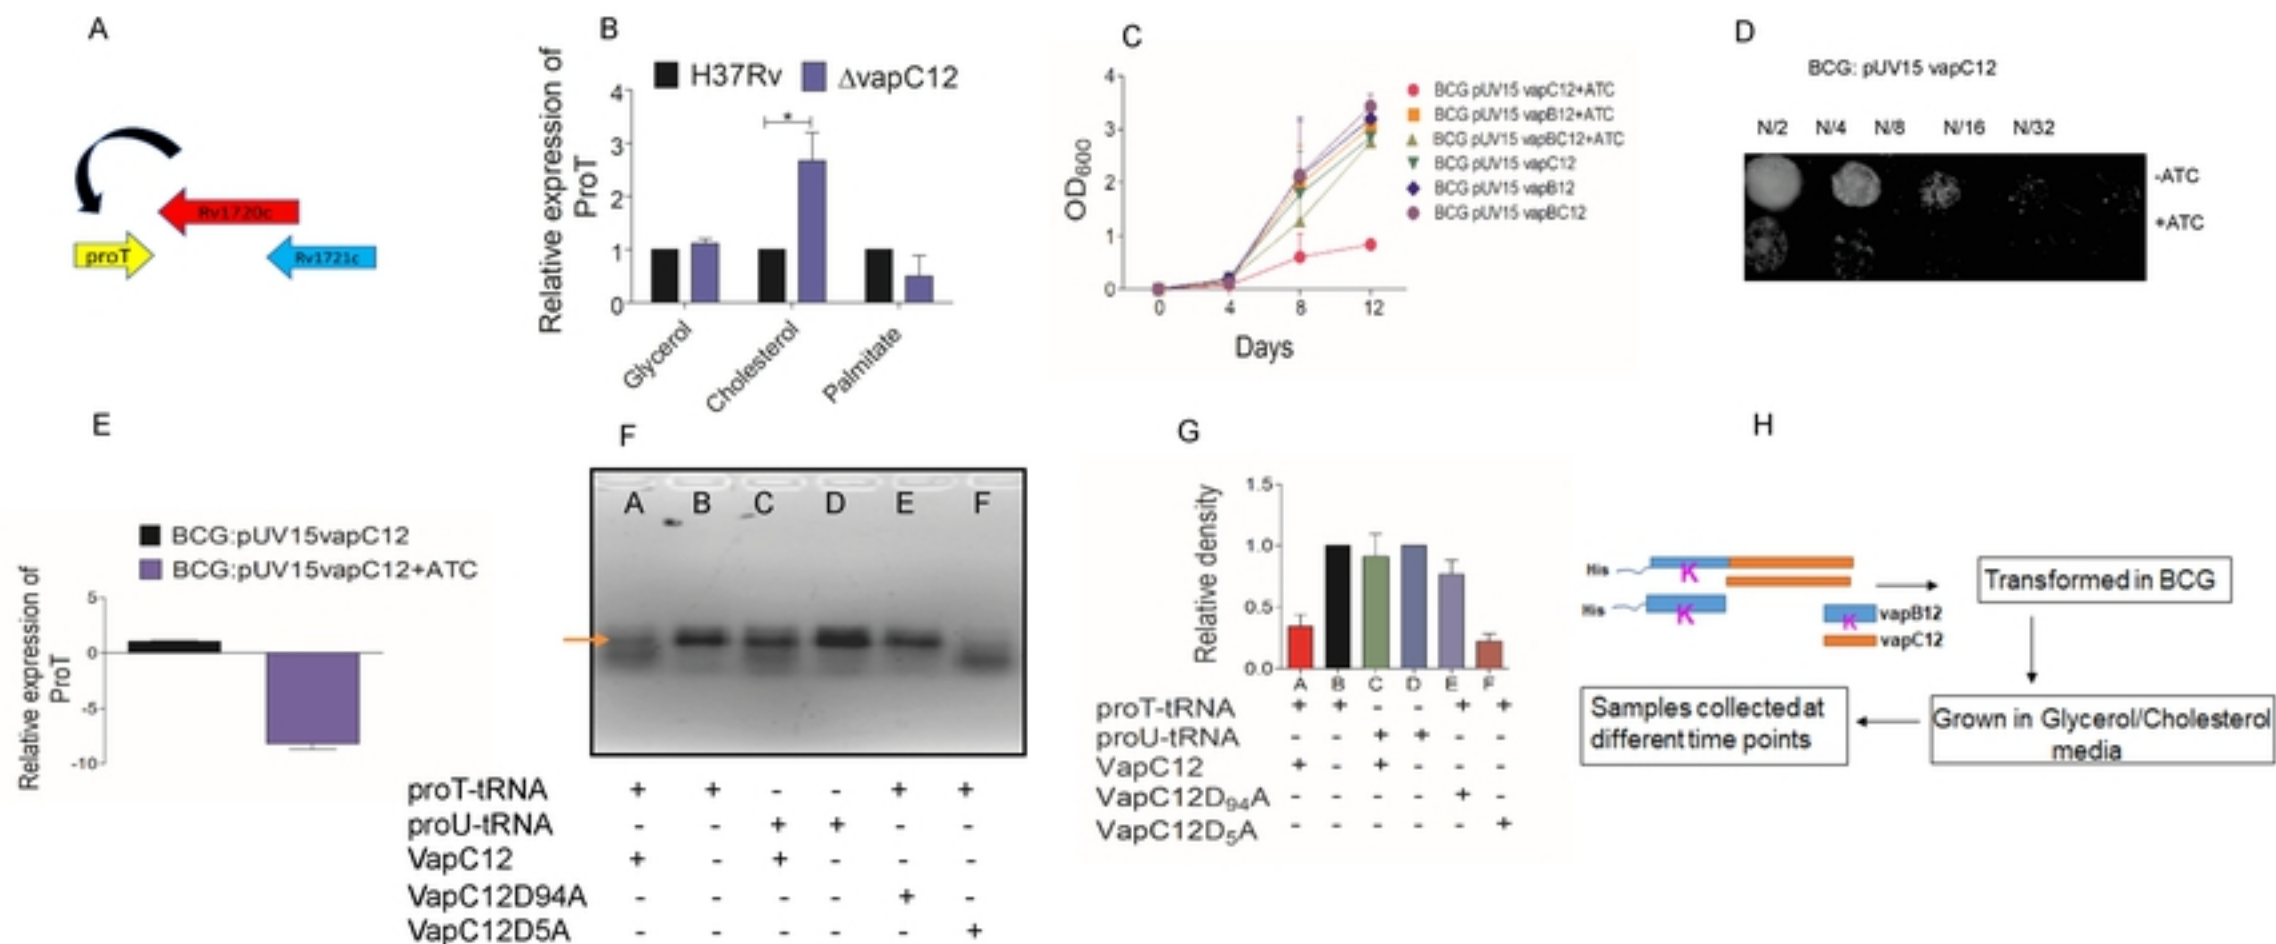

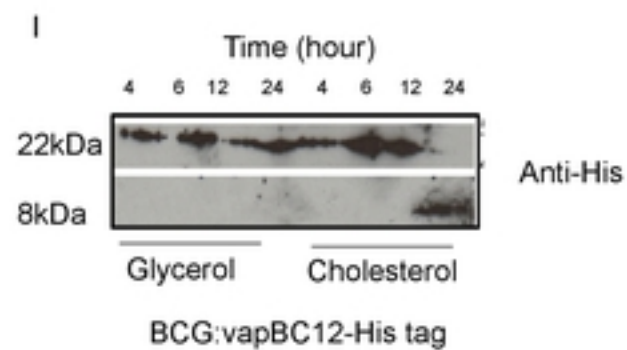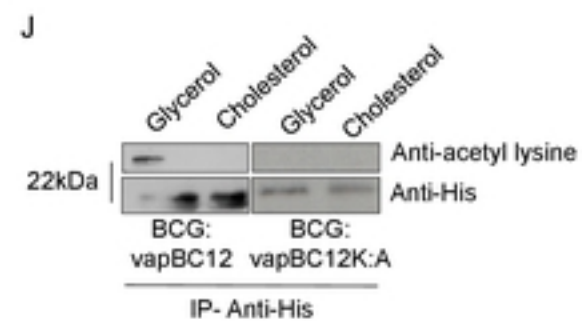

**K**

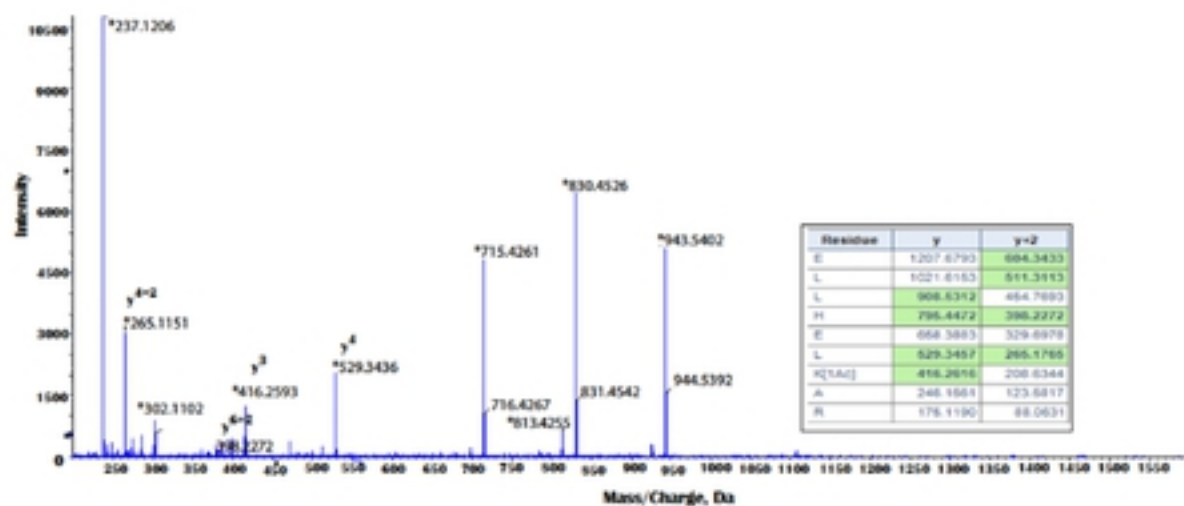

**L**

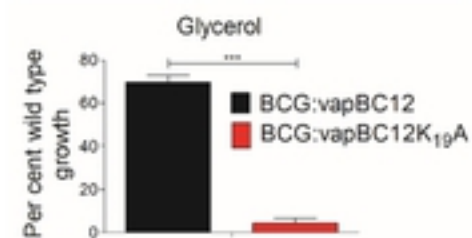



Figure 3

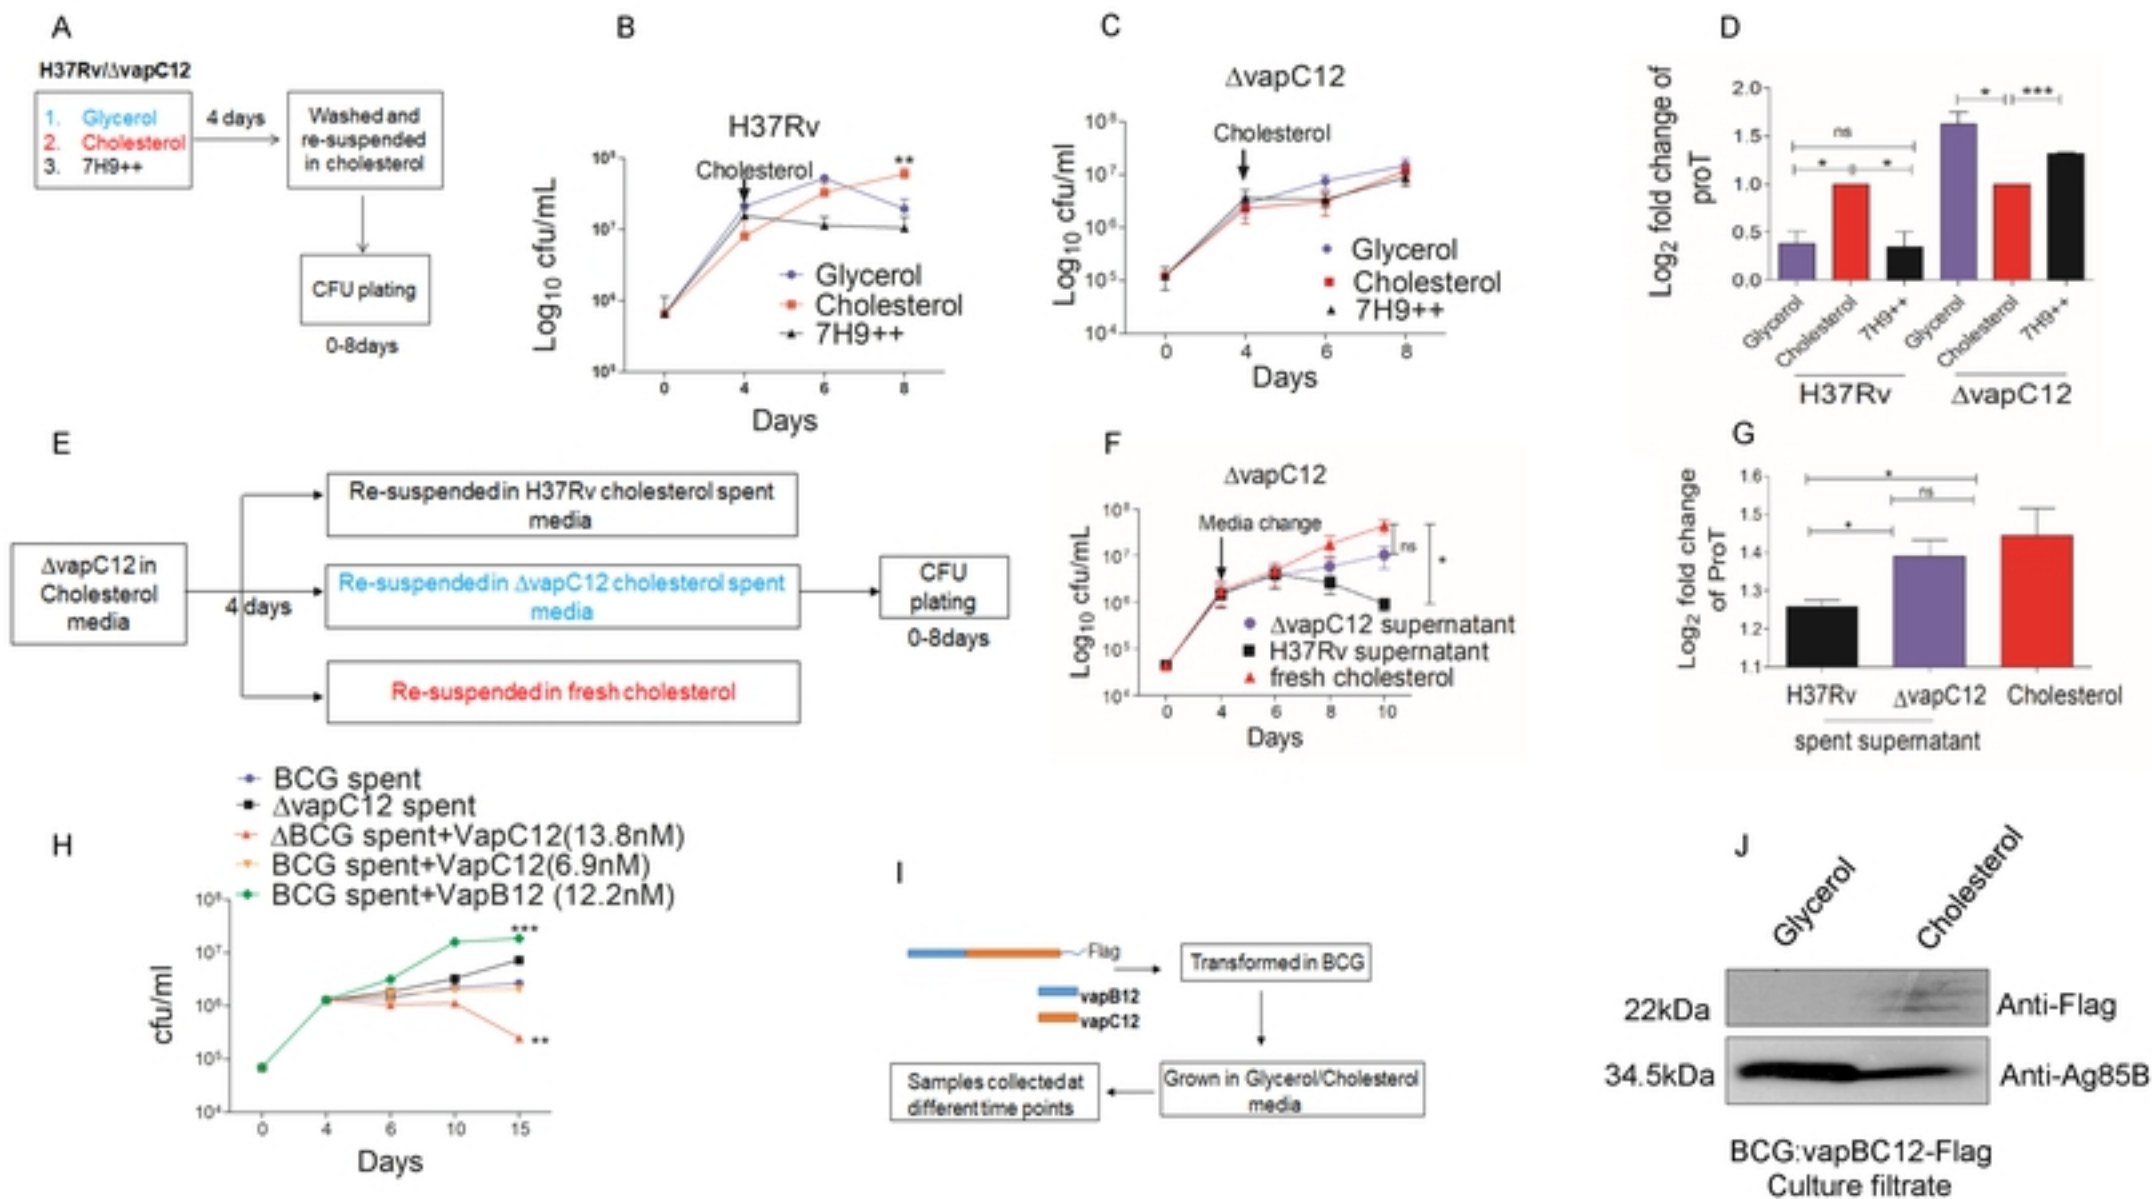

Figure 4

A

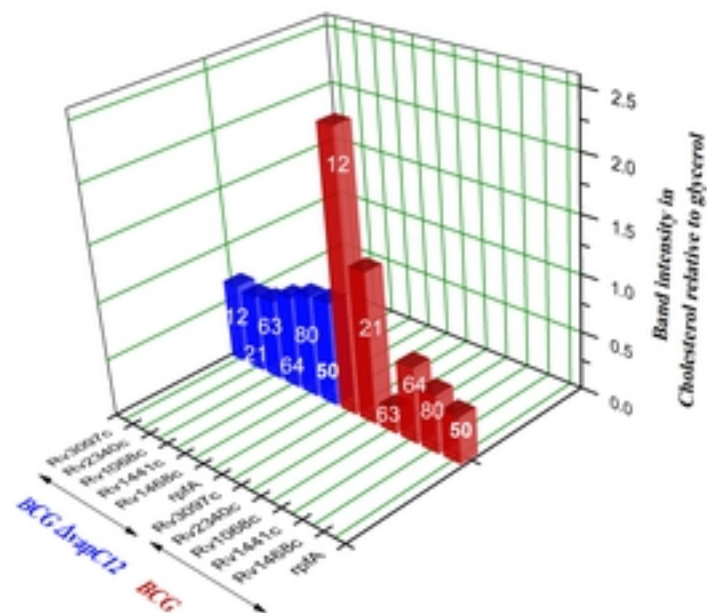

B

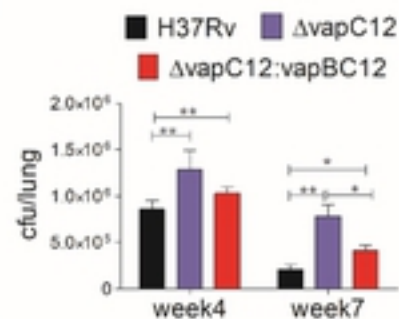

C

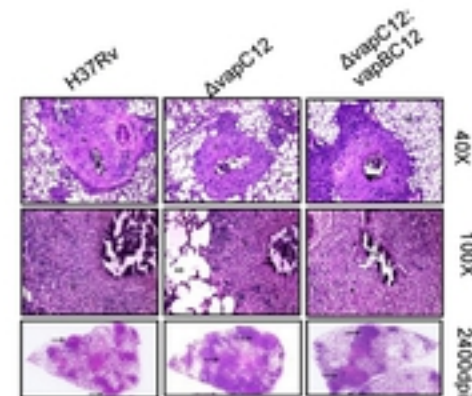

D

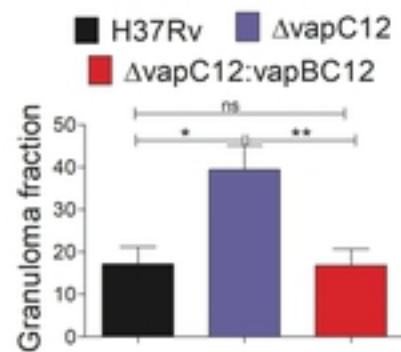

E

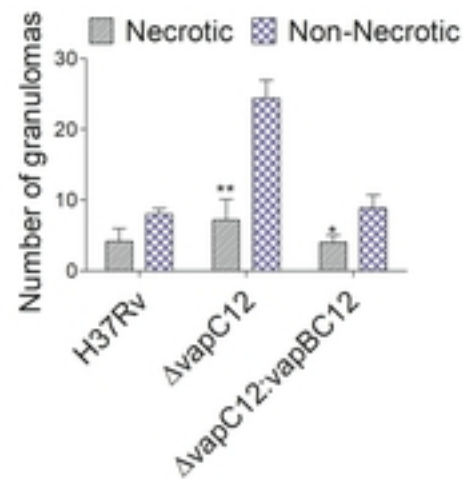

F

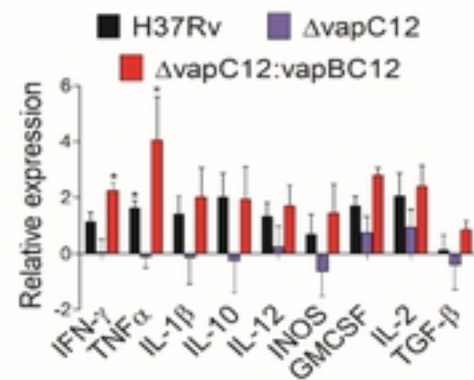

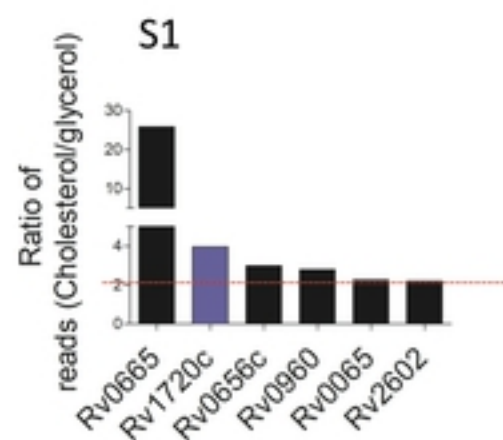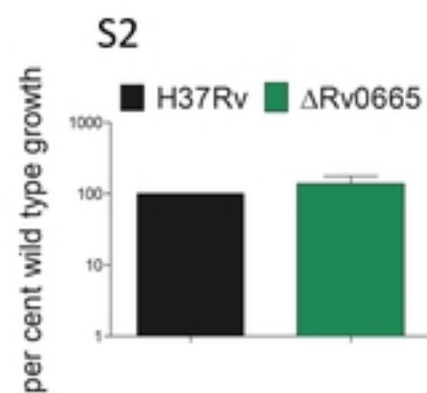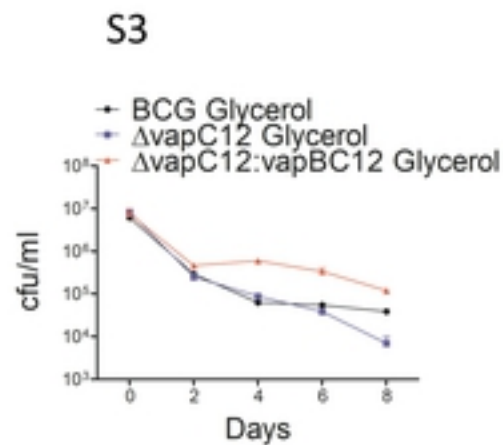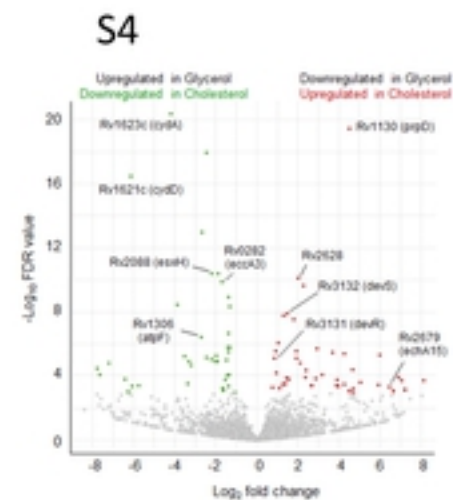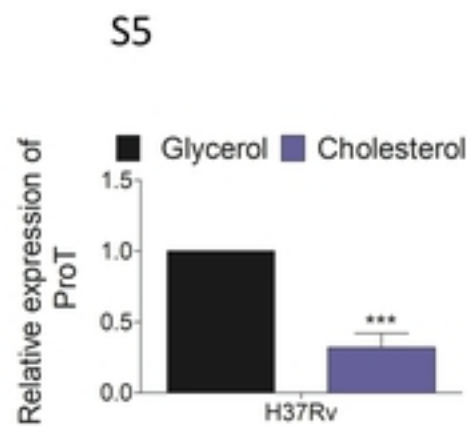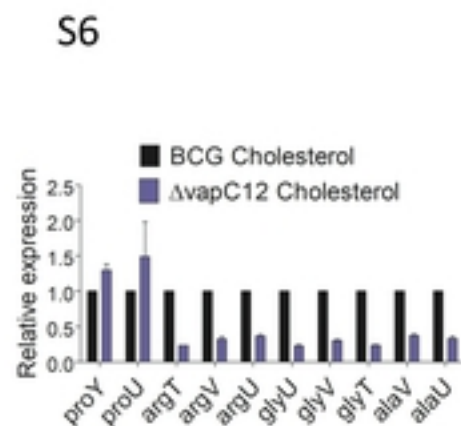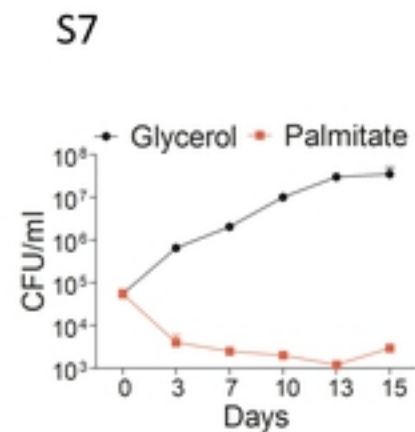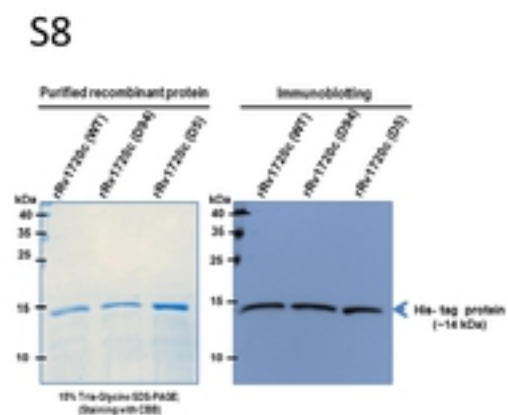

S9

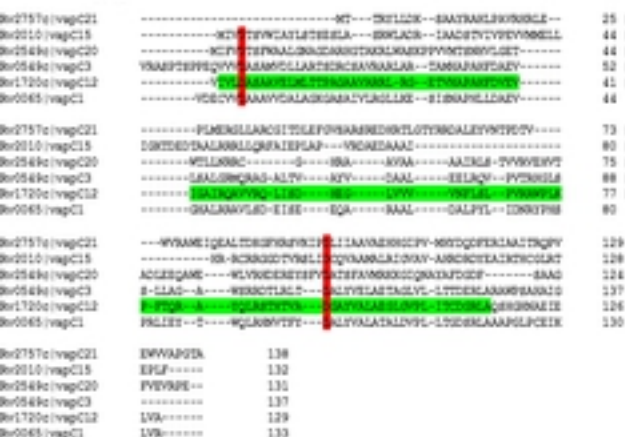

S10

Glycerol: Protein sequence coverage

```

MSAMVQIRNVPDELLHELFKARAAAQRMSLSDFLLARLAEIAEEPALDDVLDRLAALPRRDLGASAAELVDEARSE

```

Cholesterol: Protein sequence coverage

```

MSAMVQIRNVPDELLHELFKARAAAQRMSLSDFLLARLAEIAEEPALDDVLDRLAALPRRDLGASAAELVDEARSE

```

S11

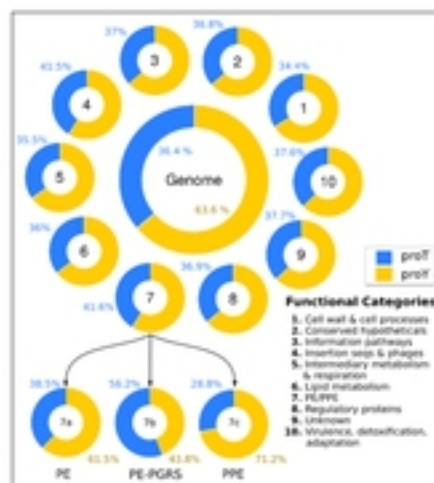

S12

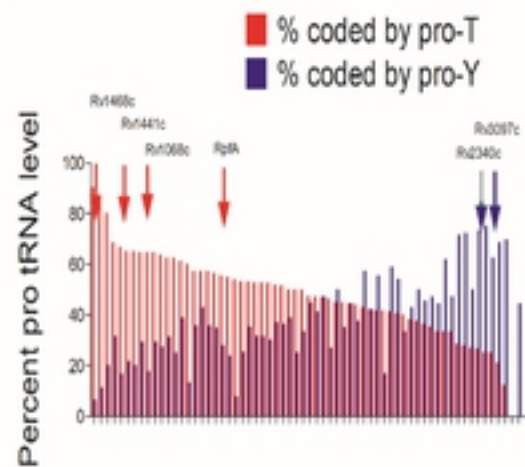

S13

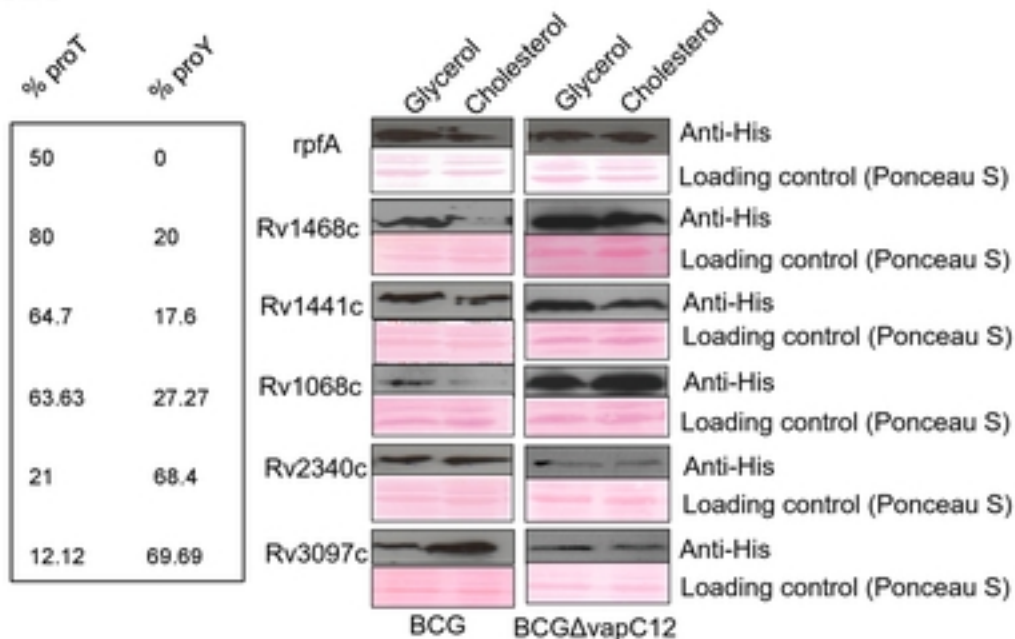

S14

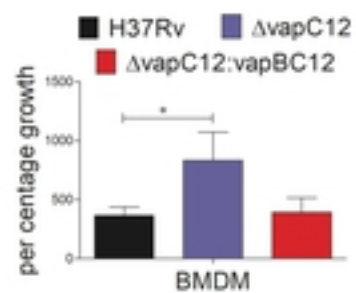

S15

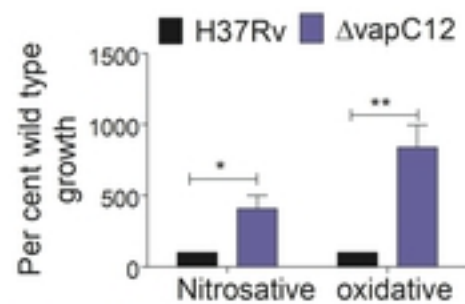

S16

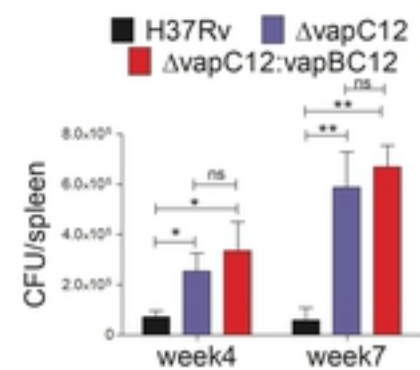

S17

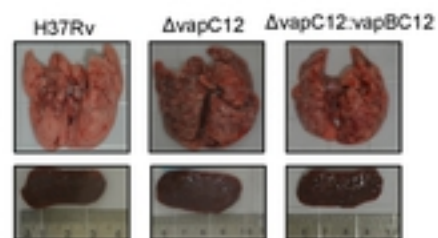

S18

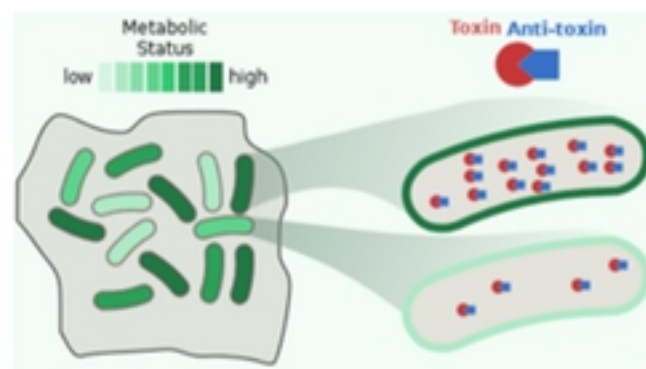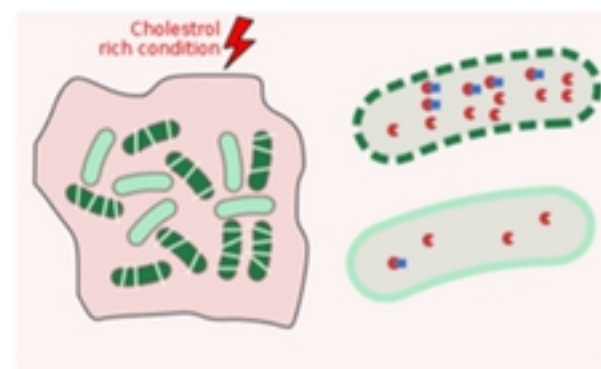

Source: https://www.biorxiv.org/content/biorxiv/early/2019/11/26/856286.full.pdf
